1  
2  
3  
4  
5  
6  
7  
8  
9  
10  
11  
12  
13  
14  
15  
16  
17  
18  
19  
20  
21  
22  
23  
24  
25

**A transcriptional cycle suited to daytime N<sub>2</sub> fixation in the unicellular cyanobacterium**

***Candidatus Atelocyanobacterium thalassa* (UCYN-A)**

María del Carmen Muñoz-Marin<sup>a, b</sup>, Irina N. Shilova<sup>a#</sup>, Tuo Shi<sup>a, c</sup>, Hanna Farnelid<sup>a, d</sup>, Ana Maria Cabello<sup>a</sup> & Jonathan P. Zehr<sup>a\*</sup>

<sup>a</sup>Ocean Sciences Department, University of California, Santa Cruz, CA, 95064, USA.

<sup>b</sup>Departamento de Bioquímica y Biología Molecular, Universidad de Córdoba, Córdoba, 14071, Spain.

<sup>c</sup>State Key Laboratory of Marine Environmental Science, Xiamen University, Xiamen, 361102, China.

<sup>d</sup>Centre for Ecology and Evolution in Microbial Model Systems (EEMiS), Linnaeus University, SE-391 82, Kalmar, Sweden.

Running Head: Diel whole genome transcription in UCYN-A

\*Address correspondence to Prof. Jonathan Zehr, [zehrj@ucsc.edu](mailto:zehrj@ucsc.edu).

# Present address: Second Genome, Inc, South San Francisco, CA, 94080, USA

26

27

## Abstract

28

29

30

31

32

33

34

35

36

37

38

39

40

41

42

43

44

45

46

47

48

49

50

The symbiosis between a marine alga and a N<sub>2</sub>-fixing cyanobacterium (UCYN-A) is geographically widespread in the oceans and is important in the marine N cycle. UCYN-A is uncultivated, and is an unusual unicellular cyanobacterium because it lacks many metabolic functions, including oxygenic photosynthesis and carbon fixation, which are typical in cyanobacteria. It is now presumed to be an obligate symbiont of haptophytes closely related to *Braarudosphaera bigelowii*. N<sub>2</sub>-fixing cyanobacteria use different strategies to avoid inhibition of N<sub>2</sub> fixation by the oxygen evolved in photosynthesis. Most unicellular cyanobacteria temporally separate the two incompatible activities by fixing N<sub>2</sub> only at night, but surprisingly UCYN-A appears to fix N<sub>2</sub> during the day. The goal of this study was to determine how the unicellular UCYN-A coordinates N<sub>2</sub> fixation and general metabolism compared to other marine cyanobacteria. We found that UCYN-A has distinct daily cycles of many genes despite the fact that it lacks two of the three circadian clock genes found in most cyanobacteria. We also found that transcription patterns in UCYN-A are most similar to marine cyanobacteria that are capable of aerobic N<sub>2</sub> fixation in the light such as *Trichodesmium* and heterocyst-forming cyanobacteria, rather than *Crocospaera* or *Cyanothece* species, which are more closely related to unicellular marine cyanobacteria evolutionarily. Our findings suggest that the symbiotic interaction has resulted in a shift of transcriptional regulation to coordinate UCYN-A metabolism with the phototrophic eukaryotic host, thus allowing efficient coupling of N<sub>2</sub> fixation (by the cyanobacterium) to the energy obtained from photosynthesis (by the eukaryotic unicellular alga) in the light.

51

52

### Importance

53       The symbiotic N<sub>2</sub>-fixing cyanobacterium UCYN-A and its eukaryotic algal host, which is  
54 closely related to *Braarudosphaera bigelowii*, have been shown to be globally distributed and  
55 important in open ocean N<sub>2</sub> fixation. These unique cyanobacteria have reduced metabolic  
56 capabilities, even lacking genes for oxygenic photosynthesis and carbon fixation. Cyanobacteria  
57 generally use energy from photosynthesis for nitrogen fixation, but require mechanisms for  
58 avoiding inactivation of the oxygen-sensitive nitrogenase enzyme by ambient oxygen (O<sub>2</sub>) or the  
59 O<sub>2</sub> evolved through photosynthesis. This study shows that the symbiosis between the N<sub>2</sub>-fixing  
60 cyanobacterium UCYN-A and its eukaryotic algal host has led to adaptation of its daily gene  
61 expression pattern in order to enable daytime aerobic N<sub>2</sub> fixation, which is likely more  
62 energetically efficient than fixing N<sub>2</sub> at night, as in other unicellular marine cyanobacteria.

63

## 64           **Introduction**

65           Nitrogen (N<sub>2</sub>)-fixing microorganisms (diazotrophs), which reduce atmospheric N<sub>2</sub> to  
66 biologically available ammonium, are critical components of aquatic and terrestrial ecosystems  
67 because they supply fixed inorganic N (1). Cyanobacteria are particularly important in N<sub>2</sub> fixation  
68 because they can fuel the energy intensive N<sub>2</sub> reduction reaction using energy supplied by  
69 oxygenic photosynthesis. In the oceans, the filamentous, non-heterocyst-forming cyanobacterium  
70 *Trichodesmium* and the heterocyst-forming symbiont of diatoms (*Richelia* and related  
71 cyanobacteria) were believed to be the major N<sub>2</sub>-fixing microorganisms until the discovery of the  
72 unicellular cyanobacteria *Crocospaera*, *Cyanothece* and Candidatus *Atelocyanobacterium*  
73 *thalassa* (UCYN-A) in the open ocean. *Crocospaera* and *Cyanothece* are free-living marine  
74 cyanobacteria, but UCYN-A is unusual in that it lacks oxygenic photosynthesis and is a symbiont  
75 of a haptophyte alga (related to *Braarudosphaera bigelowii*). The UCYN-A symbiosis is  
76 geographically widespread and is important in oceanic N<sub>2</sub> fixation (2-5). The UCYN-A genome  
77 has been greatly reduced, with massive metabolic streamlining including the loss of the oxygen-  
78 evolving Photosystem II (PSII), the carbon-fixing enzyme RuBisCO, and the entire tricarboxylic  
79 acid (TCA) cycle (6). UCYN-A has been shown to supply fixed N to the haptophyte in exchange  
80 for fixed carbon (4, 7), but it is not known how these two single-celled organisms coordinate  
81 metabolism and cell growth over the daily division cycle.

82           N<sub>2</sub> fixation requires energy and reductant, but the nitrogenase enzyme is inactivated by  
83 oxygen (O<sub>2</sub>). Cyanobacteria generally have access to sufficient energy from photosynthesis but  
84 require mechanisms for avoiding inactivation of nitrogenase and N<sub>2</sub> fixation by ambient oxygen  
85 (O<sub>2</sub>) or the O<sub>2</sub> evolved through photosynthesis. *Trichodesmium* and heterocystous cyanobacteria  
86 such as *Richelia* and *Nostoc* fix N<sub>2</sub> during the day, whereas the free-living unicellular  
87 *Crocospaera* and *Cyanothece* fix N<sub>2</sub> at night. Interestingly, the symbiotic UCYN-A appears to fix



88 N<sub>2</sub> during the day (8-10), in contrast to most other unicellular marine N<sub>2</sub>-fixing cyanobacteria,  
89 such as *Crocospaera* and *Cyanothece*.

90 The processes of N<sub>2</sub>-fixation and photosynthesis in cyanobacteria are regulated daily to  
91 increase cellular fitness and ecological competitiveness (11-13). Most cyanobacteria have  
92 circadian rhythms (11, 14, 15) that are involved in controlling daily cycles of gene transcription  
93 and protein synthesis by signal transduction pathways involving the circadian clock *kai* genes.  
94 UCYN-A lacks two of the three *kai* genes (*kaiA* and *kaiB*) known in most other cyanobacteria,  
95 whereas the non-N<sub>2</sub>-fixing cyanobacterium *Prochlorococcus* only lacks *kaiA*. Thus, the daily  
96 whole genome expression pattern in UCYN-A is of interest to determine if there are daily patterns  
97 as in all other cyanobacteria compared to evolutionarily-related unicellular cyanobacteria.

98 We used a whole genome transcription array that targets two genetically distinct uncultivated  
99 sub-lineages of UCYN-A (UCYN-A1 and UCYN-A2), which have similar, but genetically distinct  
100 hosts. We compared the UCYN-A whole genome diel transcription patterns to those of  
101 *Cyanothece* sp. ATCC 51142 (16) and *Crocospaera watsonii* WH 8501 (17) (both unicellular  
102 night-time N<sub>2</sub>-fixers) and of *Trichodesmium erythraeum* IMS101 (a filamentous non-heterocystous  
103 day-time N<sub>2</sub>-fixer). We also compared expression to whole genome expression of  
104 *Prochlorococcus* sp. MED4 (18) (a marine non-N<sub>2</sub>-fixer) in order to determine how UCYN-A  
105 gene expression compares to general cyanobacterial gene expression in a sympatric open ocean  
106 species. We found that many genes in UCYN-A have distinct diel expression patterns and that  
107 UCYN-A has unusual gene expression patterns in comparison to unicellular N<sub>2</sub>-fixing  
108 cyanobacteria that fix N<sub>2</sub> in the dark; however, it shares some general patterns with daytime N<sub>2</sub>-  
109 fixing cyanobacteria, with heterocysts of heterocyst-forming cyanobacteria and with unicellular  
110 non-N<sub>2</sub>-fixing cyanobacteria. Results suggest that optimal metabolism for open ocean  
111 cyanobacteria is aligned to the light period, and that symbiosis has enabled the unicellular UCYN-  
112 A to shift N<sub>2</sub> fixation to the daylight period.

## 113 **Results and discussion**

### 114 **UCYN-A has a daily rhythm of gene transcription**

115 UCYN-A has clear diel patterns of gene transcription, with a large fraction of genes that had  
116 periodicity of transcript levels over the dark and light periods (27%).

117 About a third of the UCYN-A genome (31% genes) targeted by the array were transcribed  
118 at detectable levels (365 of 1194 total genes in UCYN-A1 and 394 of 1244 total genes in UCYN-  
119 A2, respectively) (Table S1). Approximately 85% of these genes have differences in transcript  
120 levels between dark and light periods, accounting for 27% of the total genes in each strain (Table  
121 S1 and S2). *C. watsonii*, *Cyanothece* sp. and *Trichodesmium* cultures also had a large fraction of  
122 genes with changes in the transcript levels between dark and light periods (39% in *C. watsonii*,  
123 20% in *Cyanothece* sp. and 34% in *Trichodesmium*) (Tables S1 and S2).

124 The UCYN-A transcription values ( $\log_2$ -transformed) ranged from 2 to 13.5 with the median  
125 of 6.0. In both sub-lineages, genes coding for nitrogenase (*nif*), F<sub>0</sub>F<sub>1</sub>-ATP synthase (*atpA*, *atpB*),  
126 cytochrome *b<sub>6</sub>f* complex (*petB*, *petC*, *petF*, *petL*) and the photosynthetic gene *psaC* were the most  
127 highly transcribed in comparison to all detected genes (Table S5). Transcript levels of the same  
128 genes were also high for both sub-lineages in metatranscriptomes collected during the TARA  
129 expedition in the South Atlantic Ocean (19).

130 The two UCYN-A sub-lineages had similar periodicity of transcript levels to each other,  
131 despite divergence in gene sequences at the amino-acid level (average 14% genome-wide), cell  
132 morphology (19) and genome size (Figure 1). There were four gene clusters based on the time of  
133 day exhibiting the highest relative transcript level (Figure 1). Cluster I had the highest relative  
134 transcript level during the day (with a maximum 10 h into the light period) and included genes  
135 involved in cell division (e.g. *ftsZ*, *murG*, *minE*, *murB*), DNA replication (e.g. *topA*, *rpoE*,  
136 *DPO3B*), ABC transporters (e.g. *nikA*, *nikB*, *pstC*, *cbiO*), carbohydrate and lipid metabolism (e.g.  
137 *pdhA*, *pgi*, *fabG*, *fabH*) and a few photosynthesis genes (*petL*, *psaD* and *ccsB*). The transcripts for

138 the *petL* gene, encoding subunit 6 of the cytochrome *b<sub>6</sub>f* complex and the only nitrogen fixation-  
139 related gene in this cluster (*nifK*) had a substantial change at this time (more than 3-fold).

140 The transcript abundance of genes from clusters II and III had similar patterns, with an  
141 increase before sunrise and a decrease during the dark period. The highest relative transcript levels  
142 for clusters II and III were 4h and 1h after sunrise, respectively, and included genes involved in  
143 nitrogen fixation (*nifHDK* operon) that increased 4-fold during the light period. However, these  
144 clusters also included genes involved in oxidative phosphorylation (e. g., NADH dehydrogenases  
145 subunits and ATP synthase related genes), carbohydrate catabolism such as those involved in  
146 glycolysis (e.g. *gap1*, *fbaA*, *pgi*, *eno*), the pentose phosphate pathway (*opcA* and *zwf*) and  
147 photosynthesis (e.g. cytochrome *b<sub>6</sub>f* complex subunit genes). In most cyanobacteria, genes  
148 encoding proteins involved in carbohydrate catabolism are highly transcribed during the night and  
149 are essential for survival under dark conditions.

150 The gene with the most dramatic difference in transcript levels between the light and dark  
151 periods encoded the membrane protein COP23 (23 kDa circadian oscillating protein), which had  
152 more than a 5-fold change in transcript abundance in both UCYN-A strains (Figure 1). COP23, a  
153 protein which may have a critical role in membrane function, has only been detected in nitrogen-  
154 fixing cyanobacteria (20).

155 Cluster IV had genes with the highest transcript level during the night and lowest during the  
156 day and included genes encoding photosystem I (PSI) subunits, a carbohydrate porin (*oprB*) and  
157 also genes encoding ribosomal proteins with 2- and 4-fold changes during the night period. Cluster  
158 IV had the lowest number of genes compared with the other clusters. Surprisingly, the PSI genes  
159 (*psaA* and *psaB*) were expressed during the night as in many anoxygenic phototrophic bacteria  
160 (21), whereas in most oxygenic cyanobacteria (including mats) these genes are expressed during  
161 the day (22).

162 The results show that UCYN-A has a daily rhythm of gene expression with strong  
163 periodicities of transcript levels over the diel cycle. Daily patterns of gene transcription in  
164 cyanobacteria are typically regulated by a circadian rhythm mediated by *kai* gene products (11).  
165 Rhythmic daily transcription patterns are still possible without the full suite of *kai* genes, for  
166 example, the marine cyanobacterium *Prochlorococcus* sp. MED4 lacks one of the circadian genes,  
167 *kaiA*, yet it maintains strong diel gene transcription patterns (18). However, *Prochlorococcus* sp.  
168 PCC 9511 loses the typical periodicities of the circadian clock under continuous light (23). In the  
169 case of UCYN-A, it lacks two of the three *kai* genes (24), which is unique among cyanobacteria,  
170 and furthermore, the *kaiC* gene was not transcribed at detectable levels. It is unclear what controls  
171 the UCYN-A diel gene expression pattern, but it could be that 1) there are unidentified  
172 components of a clock and signal transduction pathway, or that 2) the pattern could be driven by  
173 the physiological differences between light and dark conditions, which might be primarily driven  
174 by energy supplied by the eukaryotic partner. It is possible that the diel transcription patterns in  
175 UCYN-A are primarily regulated by the daily host metabolism, which itself is likely to be  
176 circadian. However, it is not yet known whether the UCYN-A diel cycle is maintained under  
177 constant conditions in UCYN-A, or whether the diel pattern is maintained in the absence of the  
178 partner alga.

179

180 **UCYN-A transcription patterns are similar to aerobic marine daytime N<sub>2</sub>-fixers and**  
181 **non- N<sub>2</sub>-fixers**

182 UCYN-A had diel whole genome expression patterns that were different from those of  
183 phylogenetically closely related unicellular cyanobacteria (17). Only a few genes (such as those  
184 encoding ATP synthase) had the same daily pattern among all cyanobacteria, presumably differing  
185 because of physiology (e.g. N<sub>2</sub>-fixing or not). The unicellular cyanobacteria *C. watsonii* WH 8501  
186 and *Cyanothece* sp. ATCC 51142, which fix N<sub>2</sub> during the night, expressed many genes in an

187 opposite pattern compared to the day-time N<sub>2</sub>-fixing *T. erythraeum* and UCYN-A (Figure 2 and  
188 Tables S4 and S5). Interestingly, the diel transcription patterns of N<sub>2</sub> fixation and PSI genes in  
189 UCYN-A were opposite to those in *Cyanothece* sp. ATCC 51142 and *C. watsonii* WH 8501 and  
190 more similar to those of *T. erythraeum* (Figure 2 and Tables S4 and S5).

191 As observed for the activity of nitrogenase, it has been demonstrated that levels  
192 of *nif* transcripts and the biosynthesis of different components of the nitrogenase complex are very  
193 sensitive to O<sub>2</sub> (22, 25-27), most likely to avoid energy losses associated with the degradation of  
194 this enzyme by O<sub>2</sub>. Thus, the different patterns observed in the genes involved in N<sub>2</sub>-fixation in the  
195 cyanobacteria studied here presumably are due to the different mechanisms used to protect the  
196 nitrogenase complex from the O<sub>2</sub> produced by photosynthesis. *T. erythraeum* and UCYN-A had  
197 the maximum transcript levels of the nitrogenase and PSI genes just prior to dawn, but maintained  
198 high levels of transcripts for both sets of genes during the day. The peak of transcript levels just  
199 before dawn is likely due to the advantage of synthesizing nitrogenase in preparation for N<sub>2</sub>  
200 fixation in the early hours of the day (28).

201 The diel expression patterns of genes that are unrelated to N<sub>2</sub> fixation in the aerobic day-time  
202 N<sub>2</sub>-fixers (*T. erythraeum* and UCYN-A) were also more similar to those of non-N<sub>2</sub>-fixing  
203 sympatric cyanobacteria of the genus *Prochlorococcus* and to heterocysts of heterocyst-forming  
204 cyanobacteria than to the nighttime N<sub>2</sub>-fixing cyanobacteria (*C. watsonii* and *Cyanothece* sp.). The  
205 transcript levels of genes encoding ribosomal proteins in both UCYN-A and *T. erythraeum* were  
206 higher during the night, probably because the reduced nitrogen required for the synthesis of new  
207 proteins was obtained during the day (Figure 2 and Tables S4 and S5). Similar patterns were  
208 observed in *Prochlorococcus* with higher transcript levels during the night (Figure 2 and Tables S4  
209 and S5) while genes encoding ribosomal proteins in *C. watsonii* WH 8501 and *Cyanothece* sp.  
210 ATCC 41142 had maximum transcript levels during the day (Figure 2 and Tables S4 and S5).  
211 Intriguingly, these results imply that both UCYN-A and *T. erythraeum* have adopted day-time

212 gene transcription patterns for the main metabolic pathways minimizing cellular processes in the  
213 dark. The night-time patterns of the transcript levels of the ribosomal proteins (genes) would make  
214 it possible to have proteins synthesized in order to make the most efficient use of the light period,  
215 as in *Prochlorococcus*. Because UCYN-A and *Trichodesmium* are likely to be the two most  
216 abundant N<sub>2</sub>-fixing cyanobacteria in the open ocean, it appears that direct coupling of N<sub>2</sub> fixation  
217 to photosynthesis is important in the oligotrophic environment (as long as low oxygen  
218 concentrations are maintained in the cell).

219 Phosphorus is a vital element for cellular energetics and growth and is acquired by oceanic  
220 bacterioplankton primarily as phosphate (29-31). The UCYN-A phosphate ABC transporter had  
221 the same diel pattern as in *Trichodesmium* for genes involved in DNA replication, with higher  
222 transcript levels during the day (Table S5), but maximum transcript abundances during the late  
223 afternoon in *Crocospaera* and *Cyanothece* (17, 32). High levels of phosphate transporters during  
224 the day could meet the increased demand for inorganic phosphate (33, 34) during DNA  
225 replication, which occurs during the day in UCYN-A and *Trichodesmium*. Similar patterns were  
226 observed in the heterocyst-forming *Richelia* with peak expression of P acquisition genes at  
227 approximately 15:00, suggesting the apparent rhythmicity of P acquisition could be a common  
228 feature of daytime N<sub>2</sub>-fixers (35).

229 The initiation factor of DNA replication, DnaA, is a protein highly conserved in prokaryotes  
230 although it is absent in red algae, the cyanobacterial symbiont *Nostoc azollae* (36) and also the  
231 spheroid bodies of diatoms (37). The genome of UCYN-A lacks the *dnaA* gene as well. Recent  
232 studies suggested that DnaA is not essential for DNA replication and the lack of *dnaA* could  
233 suggest a preadaptation of the genome to enable the symbiosis (38). In UCYN-A and *T.*  
234 *erythraeum*, genes for DNA replication (*dnaE* and RNaseHI), DNA topoisomerases, DNA gyrases  
235 and cell division (*ftsZ*, *mre*, *min*) had maximum transcript levels during the day (i.e., after  
236 midday), and minimum levels at night (Figure 3A and Figure S1). In contrast, the nighttime N<sub>2</sub>-

237 fixing *Cyanothece* sp. ATCC 51142 and *C. watsonii* WH 8501 confine cell division to the period  
238 of transition from dark to light at sunrise. The temporal delay in cell division in *Cyanothece* and  
239 *Crocospaera* has been suggested to reflect the need to recover energy reserves with light-derived  
240 energy after night-time metabolic activity (39). The similarity of the pattern in UCYN-A to  
241 *Trichodesmium* is consistent with UCYN-A shifting metabolism to the daytime.

242 Microscopy counts of the *B. bigelowii* -UCYN-A2 symbiosis were performed eight times  
243 during two diel cycles in order to observe the timing of cell division (Figures 3B and C and Table  
244 S6). In both diel cycles, single host cells with two associated UCYN-A2 cells (or groups of cells),  
245 corresponding to approximately 60% of total cell counts, were present at night between 21:00 and  
246 03:00. The delay observed between the higher transcription levels after midday and actual cell  
247 division at 21:00 may be explained by the need of the cell to coordinate the assembly of the cell  
248 division machinery prior to cell division.

249

### 250 **Unique UCYN-A transcription patterns**

251 Although many gene transcription patterns in UCYN-A are more similar to  
252 *Trichodesmium* than to other unicellular N<sub>2</sub>-fixing cyanobacteria, some of the patterns were  
253 unique to UCYN-A. Such unique gene transcription patterns in the UCYN-A symbiosis may  
254 provide clues to possible roles of specific genes involved in adaptation to N<sub>2</sub>-fixing symbiosis  
255 revealing metabolic interdependence between host and symbiont. In order to compare the  
256 transcriptomic patterns of these specific genes with the rest of the N<sub>2</sub>-fixers, we performed  
257 network analysis of these genes using Pearson correlation. Whereas most of the key genes of  
258 the major pathways in UCYN-A had higher transcript levels during the day, the other  
259 unicellular N<sub>2</sub>-fixing cyanobacteria had maximum transcript levels at night (Figure 4). For  
260 example, glycolysis genes in UCYN-A had the highest levels of transcripts at sunrise and  
261 midday (maximum light conditions) in contrast to the other cyanobacteria (Figures 4 and 5).



262 The metabolic pathway that generates reductant for biosynthesis activities (NADPH), the  
263 pentose phosphate pathway (PPP), had similar patterns. The allosteric effector *opcA*, which  
264 redirects carbon flow to the first enzyme of the PPP (glucose-6-P dehydrogenase (*zwf*)) (18,  
265 40), had a different periodic transcript level pattern in UCYN-A (Figures 4 and 6) compared to  
266 other cyanobacteria (41, 42).

267  $N_2$  fixation in UCYN-A depends on the light period for the supply of photosynthate from  
268 the host during the day, as well as possibly producing ATP by cyclic photophosphorylation with  
269 PSI. Because UCYN-A cannot fix carbon dioxide, it has to obtain reduced carbon compounds  
270 in the same way. Based on genome and transcriptomic profiles, we propose a pathway of  
271 carbon metabolism for the regeneration of reductant and ATP in UCYN-A, which is needed for  
272  $N_2$  fixation (Figure 7). Carbohydrate porins or ABC transporters could transport the  
273 carbohydrates from the host to the cyanobacteria during the day and the carbon compounds  
274 metabolized through the oxidative pentose phosphate (OPP) or glycolysis pathways. Pyruvate is  
275 required for generation of reductant for nitrogenase and also to generate acetyl-CoA for  
276 synthesis of fatty acids.

277 Because UCYN-A lacks photosystem II, which normally supplies electrons to  
278 photosystem I by splitting water, UCYN-A needs alternative electron donors if it uses PSI to  
279 make the reductant NADPH. The NADH generated by the OPP pathway or by glycolysis could  
280 reduce the plastoquinone pool via the NDH-1 complex and transfer electrons to ferredoxin  
281 through the PQ pool, cytochrome *b<sub>6</sub>f* plastocyanin and the action of PSI. Ferredoxin could  
282 deliver electrons to the ferredoxin:NADPH oxidoreductase (FNR), which might provide  
283 reductant and ATP directly to the dinitrogenase reductase. To increase the ATP/e<sup>-</sup> ratio,  
284 UCYN-A can redirect electrons from PSI to NDH-1 in cyclic phosphorylation. This mechanism  
285 to supply nitrogenase with electrons was proposed years ago for heterocysts (43).



286 Together, the results are consistent with the assumption that UCYN-A uses host-supplied  
287 carbohydrates during the day while other unicellular cyanobacteria synthesize their own  
288 carbohydrates during the day and use them during the evening or at night. The unique distribution  
289 of these metabolic processes suggests that UCYN-A has developed the ability for light-driven,  
290 day-time N<sub>2</sub> fixation under oxic conditions as a result of symbiosis.

291 Apart from fixed carbon, several other compounds may be made available to UCYN-A,  
292 which may be endosymbiotic, and relies on the host for all of its essential nutrients.  
293 Interestingly, UCYN-A has the whole pathway for the synthesis of the cyanobacterial type of  
294 vitamin B<sub>12</sub>, pseudocobalamin, that can be required for the activity of several vital enzymes in  
295 central metabolism (44) (Table S8). Transcription of genes involved in B<sub>12</sub> synthesis were  
296 detected in all cyanobacteria, and some of them had diel patterns (Table S2 and S8). It is  
297 unknown if UCYN-A has enzymes that require pseudocobalamin or whether it can be used by  
298 the host. However, in order for the host to use pseudocobalamin, it would have to be remodeled  
299 in order to be accessible to the haptophyte (45). The role of pseudo-B<sub>12</sub> biosynthesis in UCYN-  
300 A is unclear, but the fact that UCYN-A retains this entire pathway, in such a reduced genome,  
301 indicates that it is likely to have an important role, perhaps in symbiosis.

302 It is still unclear how N<sub>2</sub> fixation in UCYN-A avoids the oxygen evolved by the  
303 photosynthetic host alga. There are only two possible pathways for consuming O<sub>2</sub> in UCYN-A,  
304 including aerobic (cytochrome-dependent) respiration and the photocatalyzed reduction of O<sub>2</sub> to  
305 H<sub>2</sub>O in PSI which occurs in the heterocysts of cyanobacteria like *Nostoc* sp. PCC 7120 (46-48).  
306 The latter, called the Mehler reaction, results in the production of the superoxide radical O<sub>2</sub><sup>-</sup>,  
307 which is subsequently reduced to water (49, 50).

308 In UCYN-A, the cytochrome *c* oxidase *coxA* gene was transcribed during the night (cluster  
309 IV) but also rarely during the day, along with a few N<sub>2</sub> fixation genes (cluster I) (Figure 1).  
310 Moreover, we also found higher transcript levels during the day for the antioxidant enzyme

311 superoxide dismutase (*sodI*) and two peroxiredoxins (*prxR*), which have the ability to detoxify  
312 peroxide (Figures 1 and 7). Both antioxidants would protect the nitrogenase against the reactive  
313 oxygen species produced by UCYN-A or the haptophyte host (Figure 7).

314 It is not currently possible to directly determine the oxygen protection mechanisms in this  
315 uncultured microorganism because 1) transcription cannot necessarily be related to function and 2)  
316 it is not possible to do physiological experiments with this low-abundance microorganism that has  
317 yet to be obtained in an axenic culture. Consequently, the question of protection from O<sub>2</sub> cannot be  
318 directly addressed experimentally, but our results suggest that some of the proteins in UCYN-A  
319 could help to protect nitrogenase from the O<sub>2</sub> generated by host photosynthesis.

320 Because UCYN-A has genome reduction normally associated with endosymbiosis (e.g. in  
321 *Paulinella chromatophora*; (51)), the unique gene transcription patterns of UCYN-A may provide  
322 insights into the evolution of endosymbiosis and organellar evolution. Future studies are needed to  
323 determine if the rhythm of these patterns is maintained under constant conditions as in a circadian  
324 rhythm, whether the host has a circadian rhythm and/or the daily cycle in UCYN-A simply  
325 responds to metabolite availability from the host. It will also be interesting to determine how PSI  
326 is involved in supporting the energy or reductant requirements of N<sub>2</sub> fixation. Such experiments  
327 will have to await the establishment of a pure culture.

328

## 329 **Materials and Methods**

### 330 *Diel sampling of UCYN-A*

331 Surface seawater samples for UCYN-A transcription and catalyzed reported deposition-  
332 fluorescence *in situ* hybridization (CARD-FISH) analyses were collected using a bucket from the  
333 end of the Scripps Institution of Oceanography (SIO) Ellen Browning Scripps Memorial Pier in La  
334 Jolla, CA, USA. Two replicates were collected from the bucket at each time point within 48 hours  
335 between 28<sup>th</sup> July and 1<sup>st</sup> August 2014 for transcriptomic analysis and between 3<sup>rd</sup> - 8<sup>th</sup> May 2016

336 for CARD-FISH. A total of 16 samples were collected every 3-6 hours (two replicates taken at  
337 each of eight time points): 12:00-L6, 15:00-L9, 21:00-D3, 00:00-D6, 06:00-2D12, 09:00-2L3,  
338 15:00-2L9 and 18:00-2L12. L and D stand for light and dark period, respectively, 2L and 2D the  
339 second light-dark cycle, and the number the corresponding hours entering light or dark period.

340 For the CARD-FISH assay, from each seawater replicate, 190 mL of seawater was fixed with  
341 10 mL 37% formaldehyde (1.87% v/v final concentration) at 4°C in the dark for 1 hour. After  
342 fixation, 100 mL was filtered at a maximum vacuum pressure of 100 mm Hg onto a 0.6 µm pore-  
343 size, 25 mm diameter polycarbonate membrane filter (Millipore Isopore™, EMD Millipore,  
344 Billerica, MA, USA) with a support filter of 0.8 µm pore-size, 25 mm diameter polycarbonate  
345 cellulose acetate membrane filter (Sterlitech Corporation, Kent, WA, USA). The filters were kept  
346 at -80°C until processed.

347 Samples for RNA extraction were collected by filtering a total of 500 mL from each seawater  
348 replicate through 0.22 µm pore-size, 47 mm diameter Supor filters (Pall Corporation, Port  
349 Washington, NY, USA) using a peristaltic pump. Filters were placed in sterile 2 mL bead-beating  
350 tubes with sterile glass beads, flash-frozen in liquid nitrogen and stored at -80°C until extraction.

351

#### 352 *Double CARD-FISH assay*

353 The double CARD-FISH assay was carried out following the protocol designed by Cabello  
354 et al. 2016 and Cornejo-Castillo et al. 2016. All of the probes, competitors and helpers used in this  
355 work are compiled in Table S7. More details are described in Supplementary Information.  
356 Microscopic evaluation and counting was performed with the Carl Zeiss Axioplan-2 Imaging  
357 Fluorescent Microscope (Zeiss, Berlin, Germany) in 3 transects (8.0 x 0.1 mm<sup>2</sup> each) across the  
358 filter piece. Cell dimensions were estimated using AxioVision 4.8 and Image J software (52).

#### 359 *Diel sampling of *Trichodesmium erythraeum* IMS101 cultures*

360 Biological triplicate cultures of *T. erythraeum* were grown in rectangular canted neck

361 polycarbonate cell culture flasks with a 0.2  $\mu\text{m}$  pore-size vent cap and 225  $\text{cm}^2$  surface area  
362 (Corning Inc., Corning, NY, USA). The cultures were maintained at 26°C on a 12h:12h light:dark  
363 cycle at 50  $\mu\text{mol quanta m}^{-2} \text{s}^{-1}$  in YBCII media (53) supplemented with 2.8  $\mu\text{mol L}^{-1}$  ferric  
364 ammonium citrate. The light was set on at 7:00 and off at 19:00 hours. The cultures were 10-fold  
365 diluted from the inoculum and were verified to be axenic by staining with DAPI and visualizing  
366 cells under an epifluorescence microscope (Carl Zeiss, Thornwood, NY, USA). Growth and cell  
367 density were monitored until the cultures reached exponential phase (~10-14 days after  
368 inoculation), during which the cells were harvested for the diel transcription assay. Samples were  
369 taken at 3 hours intervals starting at the onset of the light period until the end of the dark period for  
370 a total of 24 hours. A total of 27 samples were collected from these nine time points: 7:00-D12,  
371 10:00-L3, 13:00-L6, 16:00-L9, 19:00-L12, 22:00-D3, 1:00-D6, 4:00-D9 and 7:00-2D12, where L  
372 and D stand for light and dark period, respectively, 2D the second light-dark cycle, and the number  
373 the corresponding hours entering light or dark period. At each time point, 200 mL each of  
374 triplicate cultures (replicates from different flasks) was filtered onto a 5  $\mu\text{m}$  pore-size, 47 mm  
375 diameter polycarbonate membrane filter (Osmonics, Minnetonka, MN, USA). The filters were  
376 immediately frozen in liquid nitrogen and stored at -80° C until processing.

377

### 378 *RNA extraction and processing for hybridization to the microarray*

379 Environmental RNA containing transcripts from UCYN-A cells was extracted using the  
380 Ambion RiboPure Bacteria kit (Ambion®, ThermoFisher), with modifications that included  
381 mechanical lysis using glass beads (Biospec, Bartlesville, OK). The extracted RNA was treated  
382 with Turbo-DNA-free™ DNase Kit (Ambion®, ThermoFisher) to remove genomic DNA.  
383 Sufficient environmental RNA was obtained for two replicates at 4 sampling times (L6, L9, D3  
384 and 2L12): L6-1, L6-2, L9-1, L9-2, D3-1, D3-2, 2L12-1 and 2L12-2. L and D stand for light and

385 dark period, respectively, 2L and 2D the second light-dark cycle, and the number the  
386 corresponding hours entering light or dark period.

387 Total RNA for *T. erythraeum* was extracted using the Ambion RiboPure Bacteria kit  
388 (Ambion<sup>®</sup>, ThermoFisher), followed by in solution DNase digestion with the RNase-free DNase  
389 kit and on-column cleanup with the RNeasy MiniElute kit (Qiagen, Valencia, CA, USA).

390 RNA purity, concentration and quality were determined using a NanoDrop 1000 (Thermo  
391 Scientific, Waltham, MA, USA) and a 2100 Bioanalyzer (Agilent Technologies, Santa Clara, CA,  
392 USA) using the RNA 6000 Nano kit (Agilent Technologies). Only samples with RNA Integrity  
393 Number >7.0 and ratios of A260/A230 and A260/A280  $\geq 1.8$  were processed further.

394 From environmental RNA samples that contained UCYN-A, double-stranded (ds) cDNA  
395 was synthesized and amplified following the procedure described in Shilova et al..(54). Briefly,  
396 400 ng RNA from each sample was used, and 1  $\mu\text{L}$  of 1:100 dilution (corresponding to 4.7  
397 attomoles of ERCC-0016) of the (External RNA Control Consortium, (55)) RNA spike-in mix 1  
398 (Ambion<sup>®</sup>) was added before amplification to monitor the technical performance of the assay (55).

399 Double-stranded cDNA was synthesized and amplified using the TransPlex Whole  
400 Transcriptome Amplification kit (WTA-2, Sigma-Aldrich, St Louis, MO, USA) and antibody-  
401 inactivated hot-start Taq DNA Polymerase (Sigma-Aldrich). The amplified cDNA was purified  
402 with the GenElute PCR cleanup kit (Sigma-Aldrich), and the quality and quantity of ds-cDNA was  
403 determined with NanoDrop 1000 and a 2100 Bioanalyzer using the Agilent DNA 7500 kit  
404 (Agilent Technologies). Four hundred ng of total RNA yielded on average 12  $\mu\text{g}$  of ds-cDNA. The  
405 labeling and hybridization of cDNA samples (1.0  $\mu\text{g}$  of ds-cDNA) to the microarray was done at  
406 Roy J. Carver Center for Genomics (CCG) Facility (University of Iowa, Iowa city, Iowa, USA)  
407 according to the Agilent Technology for arrays protocol.

408 For *T. erythraeum*, at least 30  $\mu\text{g}$  of unamplified total RNA with a concentration of 1.0  $\mu\text{g}$   
409  $\mu\text{L}^{-1}$  per sample was provided for 27 samples. A control sample was generated by mixing equal

410 amount of total RNA, based on NanoDrop measured concentration, from each of the 27 samples  
411 resulting in 28 samples in total. Reverse transcription of the total RNA, labeling of cDNA, and  
412 hybridization to the array were performed at the Roche NimbleGen facility according to the  
413 manufacturer's protocol (Roche NimbleGen, Inc., Madison, WI, USA).

#### 414 *Design of the UCYN-A array*

415 The oligonucleotide expression array of UCYN-A was designed using UCYN-A1 and  
416 UCYN-A2 genes using eArray web-based tool (Agilent Technology Inc.;  
417 <https://earray.chem.agilent.com/earray/>) similar to the array design described in Shilova et al.(54).  
418 The gene sequences were obtained from the National Center of Biotechnology Information (NCBI,  
419 <http://www.ncbi.nlm.nih.gov>). Briefly, six probes of 60 nucleotides (nt) length were designed for  
420 each gene, and a total of 6618 probes (1199 genes) and 6862 probes (1246 genes) were designed  
421 for UCYN-A1 and UCYN-A2, respectively. These probes were replicated (4 times in the 8x60K  
422 array slides and 13 times in the 4x180K array slide) which allowed internal evaluation of signals.  
423 The sequences of all oligonucleotide probes were tested *in silico* for possible cross-hybridization  
424 as described below. The probe sequences were used as queries in the BLASTN against the  
425 available nt databases in June 2014: Marine microbes, Microbial Eukaryote Transcription and  
426 Non-redundant Nucleotides in the Community Cyberinfrastructure for Advanced Microbial  
427 Ecology Research and Analysis (CAMERA, <http://camera.calit2.net/>),(56)). Agilent technology  
428 allows 5% nt mismatch in the whole probe region, thus sequences with a range of 95–100% nt  
429 identity to the target probe are detected. Therefore, all probes with BLASTN hits with  $\geq 95\%$  over  
430 100% nt length were deleted. Next, probe sequences that passed the cross-hybridization filter,  
431 were clustered using CD-HIT-EST(57, 58) at 95% nt similarity to select unique probes for UCYN-  
432 A1 and unique probes for UCYN-A2. Finally, to select probes specific for each strain, the probes  
433 with  $\geq 95\%$  nt identity to the genes in the other strain were deleted. However, a few probes that  
434 showed cross-hybridization between both strains for highly conserved genes (such as the

435 nitrogenase gene, *nifH*) were retained. In summary, 6120 probes for 1194 genes of UCYN-A1 and  
436 6324 probes for 1244 genes of UCYN-A2 were chosen.

437 In addition, standard control probes as part of the Agilent Technology Array (IS-62976-8-  
438 V2\_60Kby8\_GX\_EQC\_201000210 with ERCC control probes added) were included randomly to  
439 feature locations on the microarray slide. The final design of the microarray was synthesized on  
440 two platforms: ca. 62976 experimental and 1319 control probes on the 8x60K array slide and ca.  
441 180880 experimental and 4854 control probes on the 4x180K array slide. The probe sequences are  
442 available at NCBI Gene Expression Omnibus (GEO) under accession number GSE100124.

443

#### 444 *Design of the T. erythraeum IMS101 array*

445 A custom oligonucleotide array for *T. erythraeum* was designed using the Roche NimbleGen  
446 platform: (NimbleGen design ID: 080610\_Trich\_earth\_UCSC\_TS\_expr) according to the complete  
447 genome assembly of *T. erythraeum* IMS101 (NC\_008312). The genome sequence is publically  
448 available via gateways including GenBank ([https://www.ncbi.nlm.nih.gov/nucleotide/NC\\_008312](https://www.ncbi.nlm.nih.gov/nucleotide/NC_008312)),  
449 IMG  
450 ([http://img.jgi.doe.gov:80/cgi-bin/pub/main.cgi?section=TaxonDetail&page=taxonDetail&taxon\\_oid=637000329](http://img.jgi.doe.gov:80/cgi-bin/pub/main.cgi?section=TaxonDetail&page=taxonDetail&taxon_oid=637000329)),  
451 and UCSC genome browser ([http://microbes.ucsc.edu/cgi-](http://microbes.ucsc.edu/cgi-bin/hgGateway?db=tricEryt_IMS101)  
452 [bin/hgGateway?db=tricEryt\\_IMS101](http://microbes.ucsc.edu/cgi-bin/hgGateway?db=tricEryt_IMS101)). Up to six 60-nt long tiling probes were designed to  
453 target each of the 4788 genes in the genome, resulting in a total of 28235 probes. The probes were  
454 duplicated on the array to allow internal evaluation of hybridization signals. Moreover, tiling 60 nt  
455 oligonucleotide probes were also designed to target the intergenic regions >60 bp in length at a  
456 150 bp interval, leading to a total of 11175 probes targeting 3877 intergenic regions (average 2.9  
457 probes per intergenic region), however hybridization data for intergenic probes are not presented  
458 here. All the probes were rank ordered and selected based on the following criteria: 1) they must  
459 have a minimum annealing temperature of 68°C; 2) there is no cross contamination among the



460 probes for different genes and for different intergenic regions. In addition to the experimental  
461 probes, standard control probes were also included on the microarray for quality assessment of the  
462 sample preparation, the hybridization process and the intensity measurements. The final  
463 microarray slides were printed in 4-plex (4x72K) format with 67645 experimental probe features  
464 and 7454 control probe features on one array. The full microarray platform descriptions and data  
465 for *T. erythraeum* are available at NCBI GEO under accession number GSE99896. Microarray  
466 hybridization signals were quantified using a GenePix 4000B Scanner (Molecular Devices,  
467 Sunnyvale, CA, USA) at the Roche NimbleGen facility.

468

#### 469 *Microarray data analysis*

470 All data analyses were performed with R ([www.R-project.org](http://www.R-project.org)) and the Bioconductor  
471 Project(59), specifically using the Biobase(60), Linear Models for Microarray LIMMA (61),  
472 arrayQualityMetrics(62), affyPLM(63, 64), and genefilter packages.

#### 473 1) *UCYN-A microarray*

474 Transcription values for each gene were obtained using median polish summarization, and  
475 values were normalized using quantile normalization (63, 64) (Figure S2). The transcription values  
476 for UCYN-A at L6, L9, D3 and 2L12 are the mean transcription of the two replicates (L6-1, L6-2,  
477 L9-1, L9-2, D3-1, D3-2, 2L12-1 and 2L12-2). Raw and normalized microarray data for UCYN-A  
478 were submitted to NCBI GEO under accession number GSE100124. To determine if transcription  
479 of a gene was detected, the signal-to-noise ratio (SNR) of each chip was calculated as:  $SNR = (S_i -$   
480  $BG)/BG$ ; where  $S_i$  is the hybridization signal for the gene and BG is the chip background signal  
481 determined as average of the lowest 5% of all signals. Transcription was considered detected if  
482 SNR of a transcript was  $\geq 5$  (as in (Shilova et al. 2014) Transcription values were centered and  
483 scaled across genes and samples, and a distance matrix was calculated using Pearson's correlation  
484 coefficient. The distance matrix was then used in hierarchical clustering by a complete



485 agglomeration method to identify clusters of genes with similar patterns of transcription during the  
486 diel transcription.

487 2) *T. erythraeum* microarray

488 The raw microarray data for *T. erythraeum* were subjected to robust multichip average  
489 (RMA) analysis (65) and quantile normalization (63, 64) (Figure 3S). Transcription values for  
490 each gene were obtained using median polish summarization (54). Final transcription value for  
491 each sample was a mean of up to twelve technical replicates (Blocks 1 and 2 with up to six  
492 replicate probes in each block in the *T. erythraeum* microarray design). A gene was selected for  
493 further analysis if it had  $\log_2$  transcription above 64 in at least 25% of samples and an interquartile  
494 range across all samples on the  $\log_2$  scale of at least 0.5. This filtering resulted in 4128 genes,  
495 which were used in further analysis.

496 3) *Comparison of diel transcription patterns for all cyanobacteria*

497 Transcription data for *Prochlorococcus* sp. MED4, *Cyanothece* sp. ATCC 51142 and  
498 *Crocospaera watsonii* WH 8501 was collected from previous published data (16-18).  
499 *Cyanothece* sp. ATCC 51142 and *C. watsonii* WH 8501 microarray data were downloaded  
500 from ArrayExpress (<http://www.ebi.ac.uk/aerep/>) using accession no. E-TABM-386 and E-  
501 TABM-737, respectively. The genes with periodic transcriptional patterns for all studied  
502 cyanobacteria (*Prochlorococcus* sp. MED4, *Cyanothece* sp. ATCC 51142, *C. watsonii* WH  
503 8501, *T. erythraeum* and UCYN-A) were identified using the R package “cycle” based on  
504 Fourier analysis, and the genes with  $FDR < 0.25$  were selected for further comparison (66)  
505 (Table S2). To compare the diel transcription patterns among the cyanobacteria, gene  
506 transcription values for each cyanobacterium were selected for over 36 hours. Eight points  
507 were selected for UCYN-A (L6, L9, D3, D6, 2D12, 2L3, 2L9, 2L12), 9 points for *T.*  
508 *erythraeum* (D12, L3, L6, L9, L12, D3, D6, D9, 2D12), 6 points for *Cyanothece* sp. ATCC  
509 51142 (L2, L6, L10, D2, D6, D10), 8 points for *C. watsonii* WH 8501 (D11, L1, L6, L11, D1,

510 D6, 2D11, 2L1) and 19 points for *Prochlorococcus* sp. MED4 (D12 - 2L12 every 2 hours). L  
511 and D stand for light and dark period, respectively, 2L and 2D the second light-dark cycle, and  
512 the number the corresponding hours entering light or dark period. Because the studies had a  
513 few dissimilar sampling times, the missing values were interpolated using the Stineman  
514 algorithm implemented in the *imputeTS* package (67). A network was constructed based on the  
515 Pearson correlation and using ‘make\_network’ function in phyloseq (68). The maximum  
516 distance between connecting nodes was selected as 0.5 unless otherwise noted in figure  
517 legends.

518

## 519 **Acknowledgments**

520 We thank J.C. Meeks (University of California, Davis) for discussions, F. Azam (Scripps  
521 Institution of Oceanography, UC San Diego) for access to Scripps facilities, and K. Turk-Kubo  
522 and M. Hogan for lab and field support. J.M. García-Fernández and J. Díez-Dapena (University of  
523 Córdoba, Spain) and Marine Landa (University of Santa Cruz, CA, USA) for helping us to  
524 improve the manuscript. Microarray data have been deposited at NCBI Gene Expression Omnibus  
525 (GEO) under accession numbers GSE100124 and GSE99896. The following secure token has  
526 been created to allow review of record GSE100124 while it remains in private status:  
527 ufchawekhzmlpaj.

528

## 529 **Author contributions**

530 M.M.M. designed the UCYN-A array, designed and performed the research and analyzed the data.  
531 I.N.S. analyzed the *T. erythraeum* array data, aided with the design of the UCYN-A array and  
532 comparison of transcription among cyanobacteria. T.S. designed the *T. erythraeum* array and  
533 performed the diel sampling of *T. erythraeum* cultures. H.F. aided sampling diel UCYN-A  
534 samples and performed the phylogenetic tree. A.M.C carried out and counted the CARD-FISH diel

535 samples. J.P.Z. conceptualized the study, and M.M.M., I.N.S., T.S., H.F. and J.P.Z. drafted and  
536 edited the manuscript and figures. All authors read and approved the final manuscript.

537

### 538 **Competing financial interests**

539 The authors declare no competing financial interest.

540

541

### 542 **References**

- 543 1. Postgate JR. 1982. The fundamentals of nitrogen fixation. Cambridge University Press,  
544 London.
- 545 2. Montoya JP, Holl CM, Zehr JP, Hansen A, Villareal TA, Capone DG. 2004. High rates  
546 of N<sub>2</sub> fixation by unicellular diazotrophs in the oligotrophic Pacific Ocean. *Nature*  
547 430:1027-1031.
- 548 3. Cabello AM, Cornejo-Castillo FM, Raho N, Blasco D, Vidal M, Audic S, de Vargas C,  
549 Latasa M, Acinas SG, Massana R. 2015. Global distribution and vertical patterns of a  
550 prymnesiophyte-cyanobacteria obligate symbiosis. *ISME J* 10:693-706.
- 551 4. Martínez-Pérez C, Mohr W, Löscher C, Dekaezemacker J, Littmann S, Yilmaz P,  
552 Lehnen N, Fuchs BM, Lavik G, Schmitz R, LaRoche J, Kuypers MM. 2016. Small  
553 unicellular diazotrophic symbiont is a key player in the marine nitrogen cycle. *Nature*  
554 *Microbiology* doi:DOI: 10.1038/NMICROBIOL.2016.163.
- 555 5. Farnelid H, Turk-Kubo K, Muñoz-Marin M, Zehr J. 2016. New insights into the  
556 ecology of the globally significant uncultured nitrogen-fixing symbiont UCYN-A.  
557 *Aquatic Microbial Ecology* 77:125-138.
- 558 6. Tripp HJ, Bench SR, Turk KA, Foster R, Desany BA, Niazi F, Affourtit JP, Zehr JP.  
559 2010. Metabolic streamlining in an open-ocean nitrogen-fixing cyanobacterium. *Nature*  
560 464.
- 561 7. Thompson AW, Foster RA, Krupke A, Carter BJ, Musat N, Vaulot D, Kuypers MMM,  
562 Zehr JP. 2012. Unicellular cyanobacterium symbiotic with a single-celled eukaryotic  
563 alga. *Science* 337:1546-1550.
- 564 8. Church M, Short C, Jenkins B, Karl D, Zehr J. 2005. Temporal patterns of nitrogenase  
565 gene (*nifH*) expression in the oligotrophic North Pacific Ocean. *Applied and*  
566 *Environmental Microbiology*.
- 567 9. Krupke A, Musat N, LaRoche J, Mohr W, Fuchs BM, Amann RI, Kuypers MMM,  
568 Foster RA. 2013. In situ identification and N<sub>2</sub> and C fixation rates of uncultivated  
569 cyanobacteria populations. *Systematic and Applied Microbiology* 36:259-271.

- 570 10. Thompson A, Carter BJ, Turk-Kubo K, Malfatti F, Azam F, Zehr JP. 2014. Genetic  
571 diversity of the unicellular nitrogen-fixing cyanobacteria UCYN-A and its  
572 prymnesiophyte host. *Environ Microbiol* 16:3238-49.
- 573 11. Cohen SE, Golden S. 2015. Circadian rhythms in cyanobacteria. *Microb Mol Biol Rev*  
574 79:373-385.
- 575 12. Bell-Pedersen D, Cassone VM, Earnest DJ, Golden SS, Hardin PE, Thomas TL, Zoran  
576 MJ. 2005. Circadian rhythms from multiple oscillators: Lessons from diverse  
577 organisms. *Nature Reviews Genetics* 6:544-556.
- 578 13. Reimers AM, Knoop H, Bockmayr A, Steuer R. 2017. Cellular trade-offs and optimal  
579 resource allocation during cyanobacterial diurnal growth. *Proc Natl Acad Sci USA*  
580 doi:<https://doi.org/10.1073/pnas.1617508114>.
- 581 14. Golden SS, Ishiura M, Johnson CH, Kondo T. 1997. Cyanobacterial circadian rhythms.  
582 *Annual Review of Plant Physiology and Plant Molecular Biology* 48:327-354.
- 583 15. Kondo T, Ishiura M. 2000. The circadian clock of cyanobacteria. *BioEssays* 22:10-15.
- 584 16. Toepel J, Welsh E, Summerfield TC, Pakrasi HB, Sherman LA. 2008. Differential  
585 transcriptional analysis of the cyanobacterium *Cyanothece* sp. strain ATCC 51142  
586 during light-dark and continuous-light growth. *J. Bacteriol* 190:3904-3913.
- 587 17. Shi T, Ilikchyan IN, Rabouille S, Zehr JP. 2010. Genome-wide analysis of diel gene  
588 expression in the unicellular N<sub>2</sub>-fixing cyanobacterium *Crocospaera watsonii* WH  
589 8501. *ISME J* 4:621-632.
- 590 18. Zinser ER, Lindell D, Johnson ZI, Futschik ME, Steglich C, Coleman ML, Wright MA,  
591 Rector T, Steen R, McNulty NP, Thompson LR, Chisholm SW. 2009. Choreography of  
592 the transcriptome, photophysiology, and cell cycle of a minimal photoautotroph,  
593 *Prochlorococcus*. *PLoS ONE* 4:e5135.
- 594 19. Cornejo-Castillo FM, Cabello AM, Salazar G, Sanchez-Baracaldo P, Lima-Mendez G,  
595 Hingamp P, Alberti A, Sunagawa S, Bork P, de Vargas C, Raes J, Bowler C, Wincker  
596 P, Zehr JP, Gasol JM, Massana R, Acinas SG. 2016. Cyanobacterial symbionts  
597 diverged in the late Cretaceous towards lineage-specific nitrogen fixation factories in  
598 single-celled phytoplankton. *Nat Commun* 7:11071.
- 599 20. Rong-Fong L, Kun-Da T, Tan-Chi H. 2003. Factors affecting the circadian degradation  
600 of COP23 in *Synechococcus* RF-1. *Botanical Bulletin-Academia Sinica Taipei* 44:151-  
601 158.
- 602 21. Klatt CG, Liu Z, Ludwig M, Khl M, Jensen SI, Bryant DA, Ward DM. 2013.  
603 Temporal metatranscriptomic patterning in phototrophic *Chloroflexi* inhabiting a  
604 microbial mat in a geothermal spring. *ISME Journal* 7:1775-1789.
- 605 22. Steunou AS, Jensen SI, Brecht E, Becraft ED, Bateson MM, Kilian O, Bhaya D, Ward  
606 DM, Peters JW, Grossman AR, Khl M. 2008. Regulation of *nif* gene expression and  
607 the energetics of N<sub>2</sub> fixation over the diel cycle in a hot spring microbial mat. *The*  
608 *ISME Journal* 2:364-378.

- 609 23. Holtzendorff J, Partensky F, Mella D, Lennon J-F, Garczarek L. 2008. Genome  
610 streamlining results in loss of robustness of the circadian clock in the marine  
611 cyanobacterium *Prochlorococcus marinus* PCC 9511. *J. Biol Rhythms* 23:187-199.
- 612 24. Axmann I, Hertel S, Wiegard A, Dörrich A, Wilde A. 2014. Diversity of KaiC-based  
613 timing systems in marine Cyanobacteria. *Marine Genomics* 14:3-16.
- 614 25. Fay P. 1992. Oxygen relations of nitrogen fixation in cyanobacteria. *Microbiology and  
615 Molecular Biology Reviews* 56:340-373.
- 616 26. Staal M, Rabouille S, Stal LJ. 2007. On the role of oxygen for nitrogen fixation in the  
617 marine cyanobacterium *Trichodesmium* sp. *Environmental Microbiology* 9:727-736.
- 618 27. Bürgmann H, Widmer F, Sigler WV, Zeyer J. 2003. mRNA extraction and reverse  
619 transcription-PCR protocol for detection of *nifH* gene expression by *Azotobacter  
620 vinelandii* in soil. *Appl. Environ. Microbiol.* 69:1928-1935.
- 621 28. Chen YB, Dominic B, Mellon MT, Zehr JP. 1998. Circadian rhythm of nitrogenase  
622 gene expression in the diazotrophic filamentous nonheterocystous cyanobacterium  
623 *Trichodesmium* sp. strain IMS 101. *J Bacteriol* 180:3598-3605.
- 624 29. Zubkov MV, Martin AP, Hartmann M, Grob C, Scanlan D. 2015. Dominant oceanic  
625 bacteria secure phosphate using a large extracellular buffer. *Nature Commun* 6.
- 626 30. Zubkov MV, Mary I, Woodward EMS, Warwick PE, Fuchs BM, Scanlan DJ, Burkill  
627 PH. 2007. Microbial control of phosphate in the nutrient-depleted North Atlantic  
628 subtropical gyre. *Environ. Microbiol* 9:2079-2089.
- 629 31. Michelou VK, Lomas MW, Kirchman DL. 2011. Phosphate and adenosine-5'-  
630 triphosphate uptake by cyanobacteria and heterotrophic bacteria in the Sargasso Sea.  
631 *Limnol Oceanogr* 56:323-332.
- 632 32. Stockel J, Welsh EA, Liberton M, Kunnvakkam R, Aurora R, Pakrasi HB. 2008. Global  
633 transcriptomic analysis of *Cyanothece* 51142 shows a robust diurnal oscillation of  
634 central metabolic processes. *Proc Natl Acad Sci USA* 105:6156-6161.
- 635 33. Davey M, Tarran G, Mills M, Ridame C, Geider R, Roche JL. 2008. Nutrient limitation  
636 of picophytoplankton photosynthesis and growth in the tropical North Atlantic. *Limnol  
637 Oceanogr* 53:1722-1733.
- 638 34. Klausmeier C, Litchman E, Levin S. 2004. Phytoplankton growth and stoichiometry  
639 under multiple nutrient limitation. *Limnol Oceanogr* 49:1463-1470.
- 640 35. Harke MJ, Frischkorn KR, Haley ST, Aylward FO, Zehr J, Dyhrman ST. 2018.  
641 Periodic and coordinated gene expression between a diazotroph and its diatom host.  
642 *ISME Journal* doi:<https://doi.org/10.1038/s41396-018-0262-2>.
- 643 36. Ran L, Larsson J, Vigil-Stenman T, Nylander J, Ininbergs K, Zheng W, Lapidus A,  
644 Lowry S, Haselkorn R, Bergman B. 2010. Genome erosion in a nitrogen-fixing  
645 vertically transmitted endosymbiotic multicellular cyanobacterium. *PLoS ONE*  
646 5:e11486.

- 647 37. Nakayama T, Kamikawa R, Tanifuji G, Kashiyama Y, Ohkouchi N, Archibald JM,  
648 Inagaki Y. 2014. Complete genome of a nonphotosynthetic cyanobacterium in a diatom  
649 reveals recent adaptations to an intracellular lifestyle. *Proc Natl Acad Sci*  
650 USA:201405222.
- 651 38. Ohbayashi R, Watanabe H, Ehira S, Kanesaki Y, Chibazakura T, Yoshikawa H. 2016.  
652 Diversification of DnaA dependency for DNA replication in cyanobacterial evolution.  
653 *The ISME J* 10:1113-1121.
- 654 39. Wilson ST, Aylward FO, Ribalet F, Barone B, Casey JR, Connell PE, Eppley JM,  
655 Ferrón S, Fitzsimons JN, Hayes CT, Romano AE, Turk Kubo K, Vislova A, Armbrust  
656 EV, Caron DA, Church M, Zehr JP, Karl D, DeLong E. 2017. Coordinated regulation  
657 of growth, activity and transcription in natural populations of the unicellular nitrogen-  
658 fixing cyanobacterium *Crocospaera*. *Nature Microbiol* 2.
- 659 40. Hagen KD, Meeks JC. 2001. The unique cyanobacterial protein OpcA is an allosteric  
660 effector of glucose-6-phosphate dehydrogenase in *Nostoc punctiforme* ATCC 29133.  
661 *Journal of Biological Chemistry* 276:11477-11486.
- 662 41. Min HT, Golden SS. 2000. A new circadian class 2 gene, *opcA*, whose product is  
663 important for reductant production at night in *Synechococcus elongatus* PCC 7942. *J*  
664 *Bacteriol* 182:6214-6221.
- 665 42. Lee S, Ryu J, SY, Jeon J, Song J, Cho H, Choi S, Choi D, Tandeau de Marsac N, Park  
666 Y. 2007. Transcriptional regulation of the respiratory genes in the cyanobacterium  
667 *Synechocystis* sp. PCC 6803 during the early response to glucose feeding. *Plant Physiol*  
668 145:1018-1030.
- 669 43. Maldener I, Muro-Pastor AM. 2010. Cyanobacterial heterocysts. In Sons JW (ed),  
670 Encyclopedia of Life Sciences (ELS) doi:DOI:  
671 10.1002/9780470015902.a0000306.pub2, Chichester, UK.
- 672 44. Martens J, Barg H, Warren M, Jahn D. 2002. Microbial production of vitamin B12.  
673 *Appl Microbiol Biotechnol* 58:275-285.
- 674 45. Helliwell KE, Lawrence AD, Holzer A, Kudahl UJ, Sasso S, Kräutler B, Scanlan DJ,  
675 Warren MJ, Smith AG. 2016. Cyanobacteria and eukaryotic algae use different  
676 chemical variants of vitamin B12. *Curr Biol* 26:999-1008.
- 677 46. Milligan AJ, Berman-Frank I, Gerchman Y, Dismukes GC, Falkowski PG. 2007. Light-  
678 dependent oxygen consumption in nitrogen-fixing cyanobacteria plays a key role in  
679 nitrogenase protection. *J Phycol* 43:845-852.
- 680 47. Valladares A, Herrero A, Pils D, Schmetterer G, Flores E. 2003. Cytochrome c oxidase  
681 genes required for nitrogenase activity and diazotrophic growth in *Anabaena* sp. PCC  
682 7120. *Mol Microbiol* 47:1239-1249.
- 683 48. Jones KM, Haselkorn R. 2002. Newly identified cytochrome c oxidase operon in the  
684 nitrogen-fixing cyanobacterium *Anabaena* sp. strain PCC 7120 specially induced in  
685 heterocysts. *J Bacteriol* 184:2491-2499.



- 686 49. Lafiti A, Ruiz M, Cheng-Cai Z. 2009. Oxidative stress in cyanobacteria. *FEMS*  
687 *Microbiol Rev* 33:258-278.
- 688 50. Milligan AJ, Berman-Frank I, Gerchman Y, Dismukes GC, Falkowski PG. 2007. Light-  
689 dependent oxygen consumption in nitrogen-fixing cyanobacteria plays a key role in  
690 nitrogenase protection. *J Phycol* 43:845-852.
- 691 51. Nakayama T, Archibald JM. 2012. Evolving a photosynthetic organelle. *BMC Mol*  
692 *Biol* 10.
- 693 52. Collins TJ. 2007. Introduction to ImageJ for light microscopy. *Microsc Microanal*  
694 13:1674-1675.
- 695 53. Chen Y, Zehr JP, Mellon MT. 1996. Growth and nitrogen fixation of the diazotrophic  
696 filamentous nonheterocystous cyanobacterium *Trichodesmium* sp. IMS 101 in defined  
697 media: evidence for a circadian rhythm *J Phycol* 32:916-923.
- 698 54. Shilova IN, Robidart JC, Tripp HJ, Turk-Kubo K, Wawrik B, Post AF, Thompson AW,  
699 Ward B, Hollibaugh JT, Millard A. 2014. A microarray for assessing transcription from  
700 pelagic marine microbial taxa. *The ISME J* 8:1476-1491.
- 701 55. Lemire A, Lea K, Batten D, Gu SJ, Whitley P, Bramlett K. 2011. Development of  
702 ERCC RNA spike-in control mixes. *J Biomol Tech* 22:S46.
- 703 56. Sun S, Chen J, Li W, Altintas I, Lin A, Peltier S, Stocks K, Allen EE, Ellisman M,  
704 Grethe J, Wooley J. 2011. Community cyberinfrastructure for Advanced Microbial  
705 Ecology Research and Analysis: the CAMERA resource *Nucl Acids Res* 39:D546-  
706 D551.
- 707 57. Huang Y, Niu B, Gao Y, Fu L, Li W. 2010. CD-HIT Suite: a web server for clustering  
708 and comparing biological sequences. *Bioinformatics* 26:680-682.
- 709 58. Li W, Godzik A. 2006. Cd-hit: a fast program for clustering and comparing large sets  
710 of protein or nucleotide sequences. *Bioinformatics* 22:1658 - 1659.
- 711 59. Gentleman R, Carey V, Bates D, Bolstad B, Dettling M, Dudoit S, Ellis B, Gautier L,  
712 Ge Y, Gentry J, Hornik K, Hothorn T, Huber W, Iacus S, Irizarry R, Leisch F, Li C,  
713 Maechler M, Rossini A, Sawitzki G, Smith C, Smyth G, Tierney L, Yang J, Zhang J.  
714 2004. Bioconductor: open software development for computational biology and  
715 bioinformatics. *Genome Biology* 5:R80.
- 716 60. Huber W, Carey JV, Gentleman R, Anders S, Carlson M, Carvalho SB, Bravo CH,  
717 Davis S, Gatto L, Girke T, Gottardo R, Hahne F, Hansen DK, Izarray AR, Lawrence M,  
718 Love IM, Waldron L, Morgan. 2015. Orchestrating high-throughput genomic analysis  
719 with Bioconductor. *Nat Meth* 12:115121.
- 720 61. Smyth GK. 2005. Limma: Linear models for microarray data., p 397-420. *In* Gentleman  
721 R, Carey V, Dudoit S, Irizarry R, Huber W (ed), *Bioinformatics and Computational*  
722 *Biology Solutions using R and Bioconductor*. Springer, New York.
- 723 62. Kauffmann A, Gentleman R, Huber W. 2009. arrayQualityMetrics-a bioconductor  
724 package for quality assessment of microarray data. *Bioinformatics* 25:415-416.

- 725 63. Bolstad BM, Collin F, Brettschneider J, Simpson K, Cope L, Irizarry RA, Speed TP.  
726 2005. Quality Assessment of Affymetrix GeneChip Data, p 33-47. *In* Springer NY (ed),  
727 Bioinformatics and Computational Biology Solutions using R and Bioconductor.
- 728 64. Bolstad B. 2004. Low level analysis of high-density oligonucleotide Array Data:  
729 Background, Normalization and Summarization University of California, Berkeley.
- 730 65. Irizarry R, Hobbs B, Collin F, Beazer-Barclay Y, Antonellis K, Scherf U, Speed T.  
731 2003. Exploration, normalization, and summaries of high density oligonucleotide array  
732 probe level data. *Biostatistics* 4:249.
- 733 66. Futschik ME, Herzel H. 2008. Are we overestimating the number of cell-cycling genes?  
734 The impact of background models on time series analysis. *Bioinformatics* 24:1063-  
735 1069.
- 736 67. Moritz S, Sardá A, Bartz-Beielstein T, Zaefferer M, Stork J. 2015. Comparison of  
737 different methods for univariate time series imputation in R. arXiv:151003924
- 738 68. McMurdie P, Holmes S. 2013. Phyloseq: An R package for reproducible interactive  
739 analysis and graphics of microbiome census data. *PLoS ONE* 8:e61217.  
740
- 741



742 **Titles and legends to main figures**

743 **Figure 1.** Four different clades based on Pearson correlation of the transcription profile of  
744 UCYN-A1 and UCYN-A2 genes over light–dark cycles. The transcription value of each gene at  
745 each time point was normalized to the mean at all time points and divided by standard deviation  
746 (SD) (*Y* axis, log 2 scale). The *X* axis represents time points where D and L stand for dark and  
747 light, respectively, followed by the corresponding hour into the light or dark periods. The second  
748 light-dark cycle is shown as 2D followed by the number of the corresponding hours entering light  
749 or dark period. The shaded area represents the dark period. In each cluster, most representative  
750 genes are listed in the table attached to the plot. UCYN-A1 genes are coded in green and UCYN-  
751 A2 genes are coded in orange.

752

753

754 **Figure 2. A.** Transcriptional network based on Pearson correlation of gene transcription over the  
755 diel cycle in all studied cyanobacteria. The genes are connected if correlation coefficient for their  
756 transcription patterns is higher than 0.5. The genes shown are diel genes with variable transcription  
757 patterns among the studied cyanobacteria. The arrows point to genes for glycolysis, PPP and N<sub>2</sub>  
758 fixation in the studied diazotrophs. The purple circles demarcate genes for ribosomal proteins  
759 included in the analysis. Abbreviations: *Prochlorococcus* sp. MED4 (Pro), *Cyanothece* sp. ATCC  
760 51142 (Cya), *C. watsonii* WH 8501 (Cro), *T. erythraeum* (Tricho), Pentose Phosphate Pathway  
761 (PPP), Photosystem I (PSI). **B.** Four time course plots are attached for the N<sub>2</sub>-fixing cyanobacteria  
762 showing the diel transcription patterns of photosystem I, N<sub>2</sub> fixation and genes for ribosomal  
763 proteins.

764

765 **Figure 3.** Transcription of genes for replication and cell division in UCYN-A. **Upper Panel: A)**  
766 Diel transcription patterns for cell division and replication genes in UCYN-A1 and UCYN-A2  
767 over the light-dark cycle. Hierarchical clustering of genes was based on Pearson correlation

768 between their transcription profiles. The transcription values of genes at each time point were  
769 standardized, and the blue-red scale shows how many standard deviations a transcription value  
770 was lower or higher, respectively, from the mean transcription values over the diel cycle (Z score).  
771 Gene ID and gene product corresponding to each gene for UCYN-A1 and UCYN-A2 are shown.  
772 Time is shown on X-axis as light (L) and dark (D), respectively, followed by the corresponding  
773 hour after the sunrise and sunset periods started. The second light-dark cycle is shown as 2D  
774 followed by the number of the corresponding hours entering light or dark period.

775 **Lower Panel:** Epifluorescence micrographs of dividing UCYN-A2 detected with CARD-FISH  
776 (19). **B)** Two big clusters of UCYN-A2 cells and the haptophyte host attached. Left Panel: the  
777 nucleus of the host and the UCYN-A2 cells were visualized with-DAPI stain (blue). Right Panel:  
778 The UCYN-A2 (red) and its haptophyte host (green). **C)** Two different associations of UCYN-A2  
779 with its haptophyte dividing in samples from Scripps Pier.

780

781 **Figure 4.** Network showing the Pearson correlation for gene transcriptions in the unicellular N<sub>2</sub>-  
782 fixing cyanobacteria *Cyanothece* sp. ATCC 51142 (*Cyanothece*), *C. watsonii* WH 8501  
783 (*Crocospaera*) and UCYN-A. Shown here are key genes in major metabolic pathways with  
784 distinct diel transcription patterns. The genes are connected if their correlation coefficient for  
785 transcription patterns is higher than 0.2. PPP, pentose phosphate pathway; PSI, photosystem I.

786

787 **Figure 5.** Transcriptional profiles of the genes for glycolysis over light-dark cycles in the  
788 cyanobacteria studied here. The transcription value of each gene at each time point was  
789 normalized to the mean at all time points and divided by standard deviation (SD) (Y axis, log  
790 scale). The X axis represents time points where D and L stand for dark and light, respectively,  
791 followed by the corresponding hour into the light or dark periods. The second light-dark cycle is

792 shown as 2D followed by the number of the corresponding hours entering light or dark period. The  
793 shaded area represents the dark period.

794

795 **Figure 6.** Transcriptional profiles of *opcA* (allosteric effector) and *zwf* (glucose-6-P  
796 dehydrogenase) over light–dark cycles in the cyanobacteria studied here. The transcription value  
797 of each gene at each time point was normalized to the mean at all time points and divided by  
798 standard deviation (SD) (Y axis, log scale). The X axis represents time points where D and L stand  
799 for dark and light, respectively, followed by the corresponding hour into the light or dark periods.  
800 The second light-dark cycle is shown as 2D followed by the number of the corresponding hours  
801 entering light or dark period. The shaded area represents the dark period.

802

803 **Figure 7.** Schematic model of UCYN-A showing the possible main cellular functions, metabolic  
804 pathways and transporters.

805

806

807

808

809

810

811

812

813

814

815

816

817

818

819

# Organism

UCYN-A1

UCYN-A2

| UCYN-A1     |              | UCYN-A2      |             |
|-------------|--------------|--------------|-------------|
| <i>fabD</i> | <i>ftsZ</i>  | -            | -           |
| -           | <i>tpi</i>   | <i>fabH</i>  | -           |
| <i>lpxC</i> | -            | <i>lpxC</i>  | <i>rpe</i>  |
| <i>sqd1</i> | <i>pdha</i>  | -            | <i>pdha</i> |
| <i>hypD</i> | -            | <i>thiL</i>  | -           |
| <i>cbio</i> | <i>acp</i>   | <i>acp</i>   | -           |
| <i>pstA</i> | <i>glnA</i>  | <i>glnA</i>  | -           |
| <i>pstC</i> | <i>g6pd</i>  | <i>pstcC</i> | -           |
| <i>minD</i> | -            | -            | <i>accD</i> |
| -           | <i>accA</i>  | <i>minE</i>  | -           |
| -           | -            | <i>mreC</i>  | <i>topA</i> |
| <i>g6pi</i> | -            | -            | <i>rpoE</i> |
| <i>murG</i> | <i>dpo3</i>  | -            | -           |
| <i>murE</i> | -            | -            | <i>sufB</i> |
| -           | <i>fepB</i>  | <i>murJ</i>  | -           |
| -           | <i>fepGD</i> | <i>murB</i>  | -           |

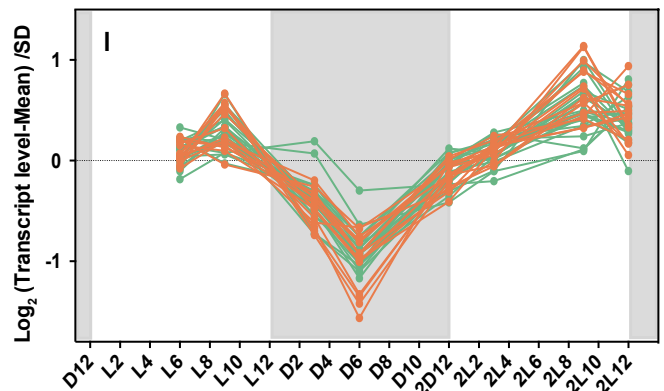

| UCYN-A1      |              | UCYN-A2 |   |
|--------------|--------------|---------|---|
| <i>atpF</i>  | <i>atpF</i>  | -       | - |
| <i>atpB</i>  | <i>atpB</i>  | -       | - |
| -            | <i>atpA</i>  | -       | - |
| <i>pgd</i>   | -            | -       | - |
| <i>rpiA</i>  | <i>pstA</i>  | -       | - |
| <i>cop23</i> | <i>cop23</i> | -       | - |
| <i>iscA</i>  | <i>iscA</i>  | -       | - |
| -            | <i>eno</i>   | -       | - |
| -            | <i>ndhK</i>  | -       | - |
| -            | <i>ndhC</i>  | -       | - |
| -            | <i>psaJ</i>  | -       | - |
| -            | <i>psaL</i>  | -       | - |
| -            | <i>tktA</i>  | -       | - |
| -            | <i>pgd</i>   | -       | - |

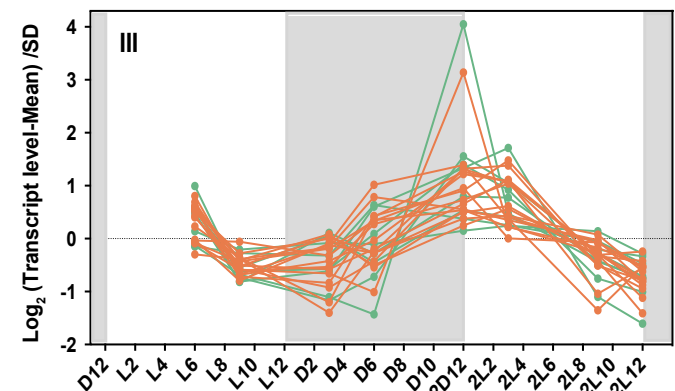

| UCYN-A1     |             | UCYN-A2     |             |
|-------------|-------------|-------------|-------------|
| <i>ndhJ</i> | <i>petC</i> | <i>ndhJ</i> | <i>petC</i> |
| <i>ndhD</i> | <i>petF</i> | <i>ndhD</i> | <i>petF</i> |
| <i>hupS</i> | <i>nikB</i> | -           | -           |
| -           | <i>sufB</i> | <i>hypE</i> | -           |
| -           | -           | <i>hypD</i> | <i>petH</i> |
| <i>g3pd</i> | -           | -           | <i>lpxA</i> |
| -           | -           | <i>fba</i>  | <i>lpxB</i> |
| <i>atpA</i> | <i>fabH</i> | <i>atpA</i> | -           |
| <i>atpI</i> | <i>fabF</i> | <i>atpI</i> | -           |
| -           | <i>prpS</i> | <i>atpF</i> | -           |
| <i>atpC</i> | <i>accC</i> | -           | -           |
| <i>psaC</i> | -           | <i>psaC</i> | <i>gpi</i>  |
| <i>minE</i> | <i>nifU</i> | -           | -           |
| -           | <i>nifH</i> | <i>ftsZ</i> | <i>nifH</i> |
| -           | <i>nifD</i> | <i>murD</i> | <i>nifD</i> |
| <i>prxR</i> | <i>sod1</i> | <i>prxR</i> | -           |
| <i>petA</i> | -           | <i>petA</i> | <i>nifK</i> |

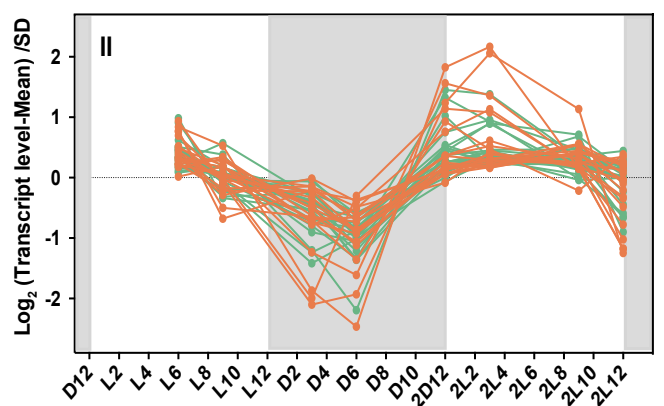

| UCYN-A1      |   | UCYN-A2      |              |
|--------------|---|--------------|--------------|
| <i>psaA</i>  | - | <i>psaA</i>  | <i>rps13</i> |
| <i>psaB</i>  | - | -            | <i>rpl13</i> |
| <i>oprB</i>  | - | <i>oprB</i>  | <i>rpl18</i> |
| <i>rpl11</i> | - | <i>rpl11</i> | <i>rpl5</i>  |
| <i>nusG</i>  | - | -            | <i>rps9</i>  |
| <i>secE</i>  | - | -            | <i>rpl24</i> |
| <i>rps19</i> | - | <i>rps19</i> | <i>rpl2</i>  |
| <i>rpl22</i> | - | <i>rpl22</i> | <i>rpl3</i>  |
| <i>rpl16</i> | - | -            | <i>rpl23</i> |
| <i>rpl24</i> | - | -            | <i>rpl29</i> |
| <i>rps8</i>  | - | -            | <i>rpl1</i>  |
| <i>rpl6</i>  | - | -            | <i>guaB</i>  |
| <i>rpl15</i> | - | <i>rpl15</i> | <i>sqdB</i>  |
| <i>dnaE</i>  | - | -            | <i>acyl</i>  |
| <i>truA</i>  | - | -            | <i>rpoA</i>  |
| -            | - | <i>coxB</i>  | -            |

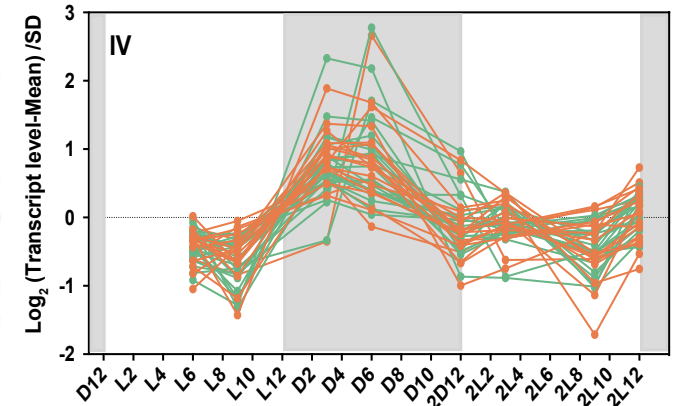

Ribosomal proteins (Pro, Tricho and UCYN-A)

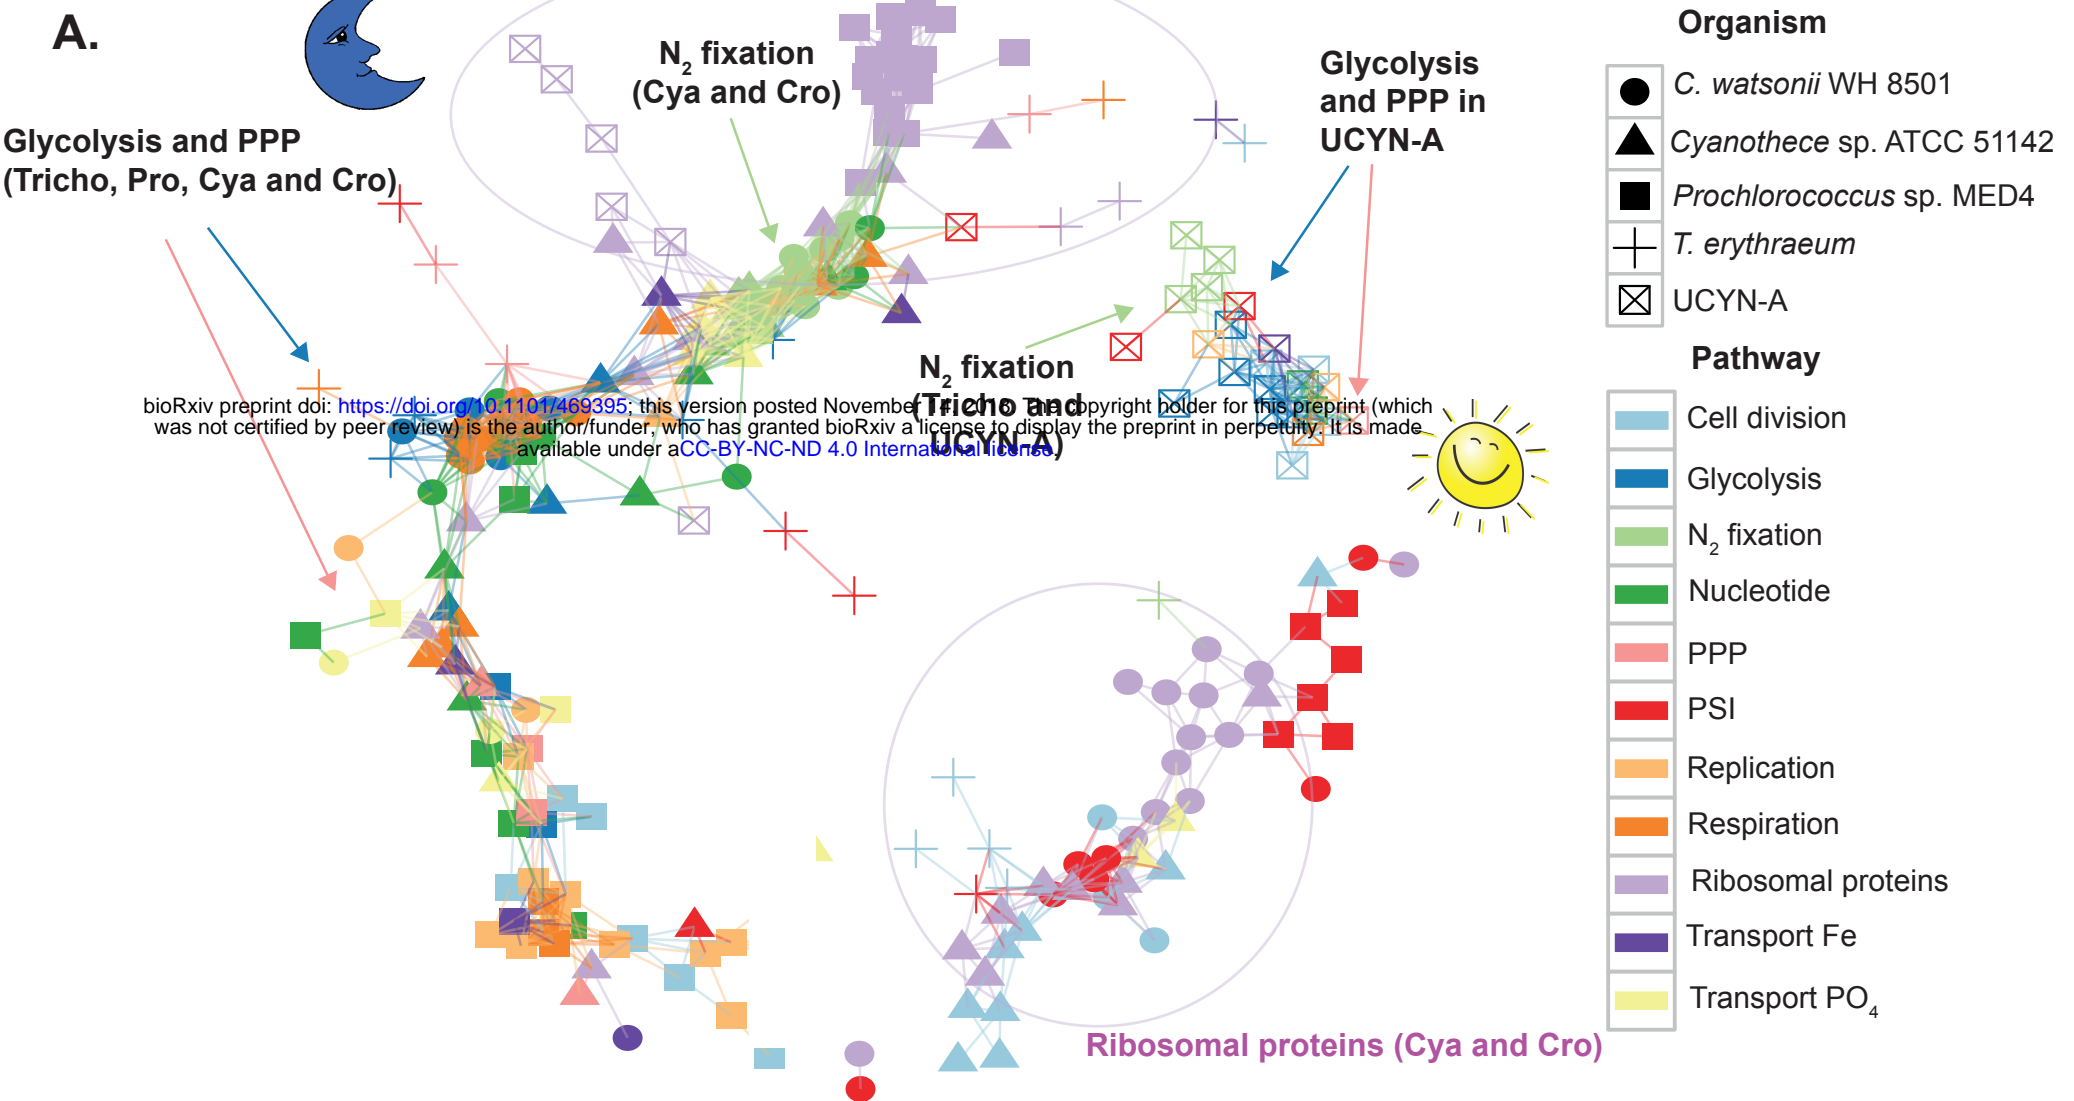

**B.**

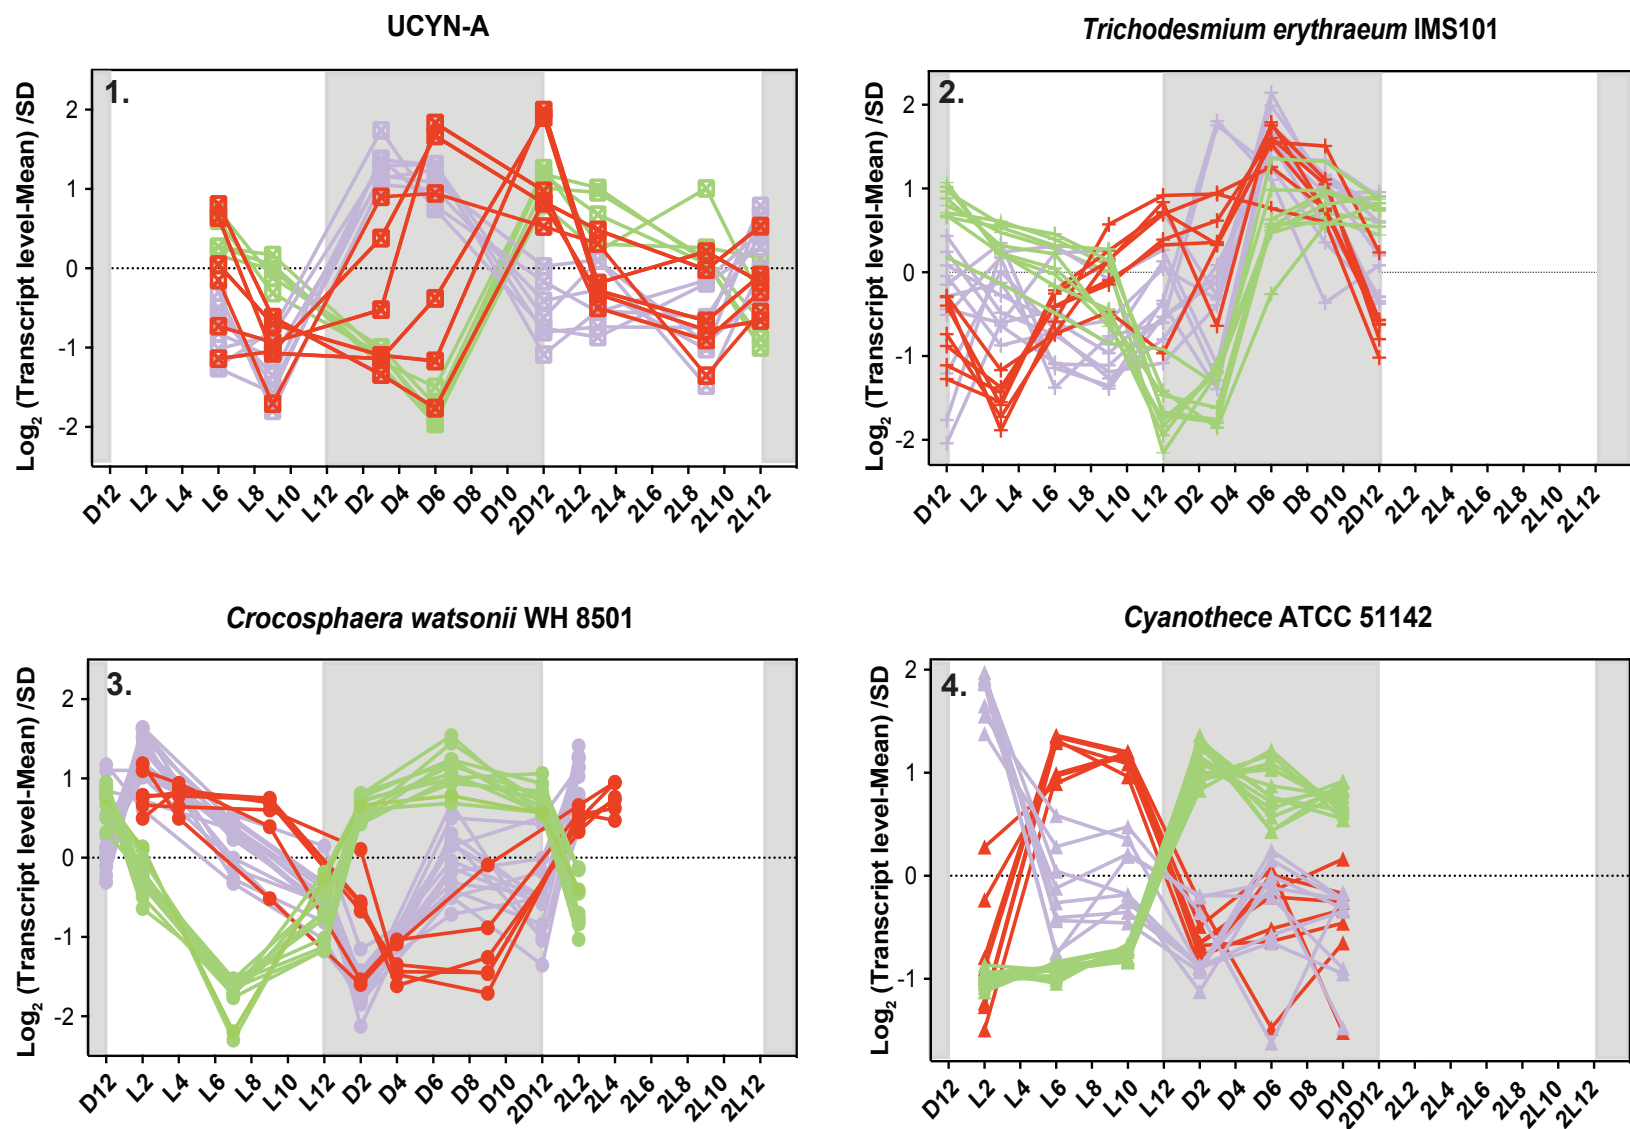



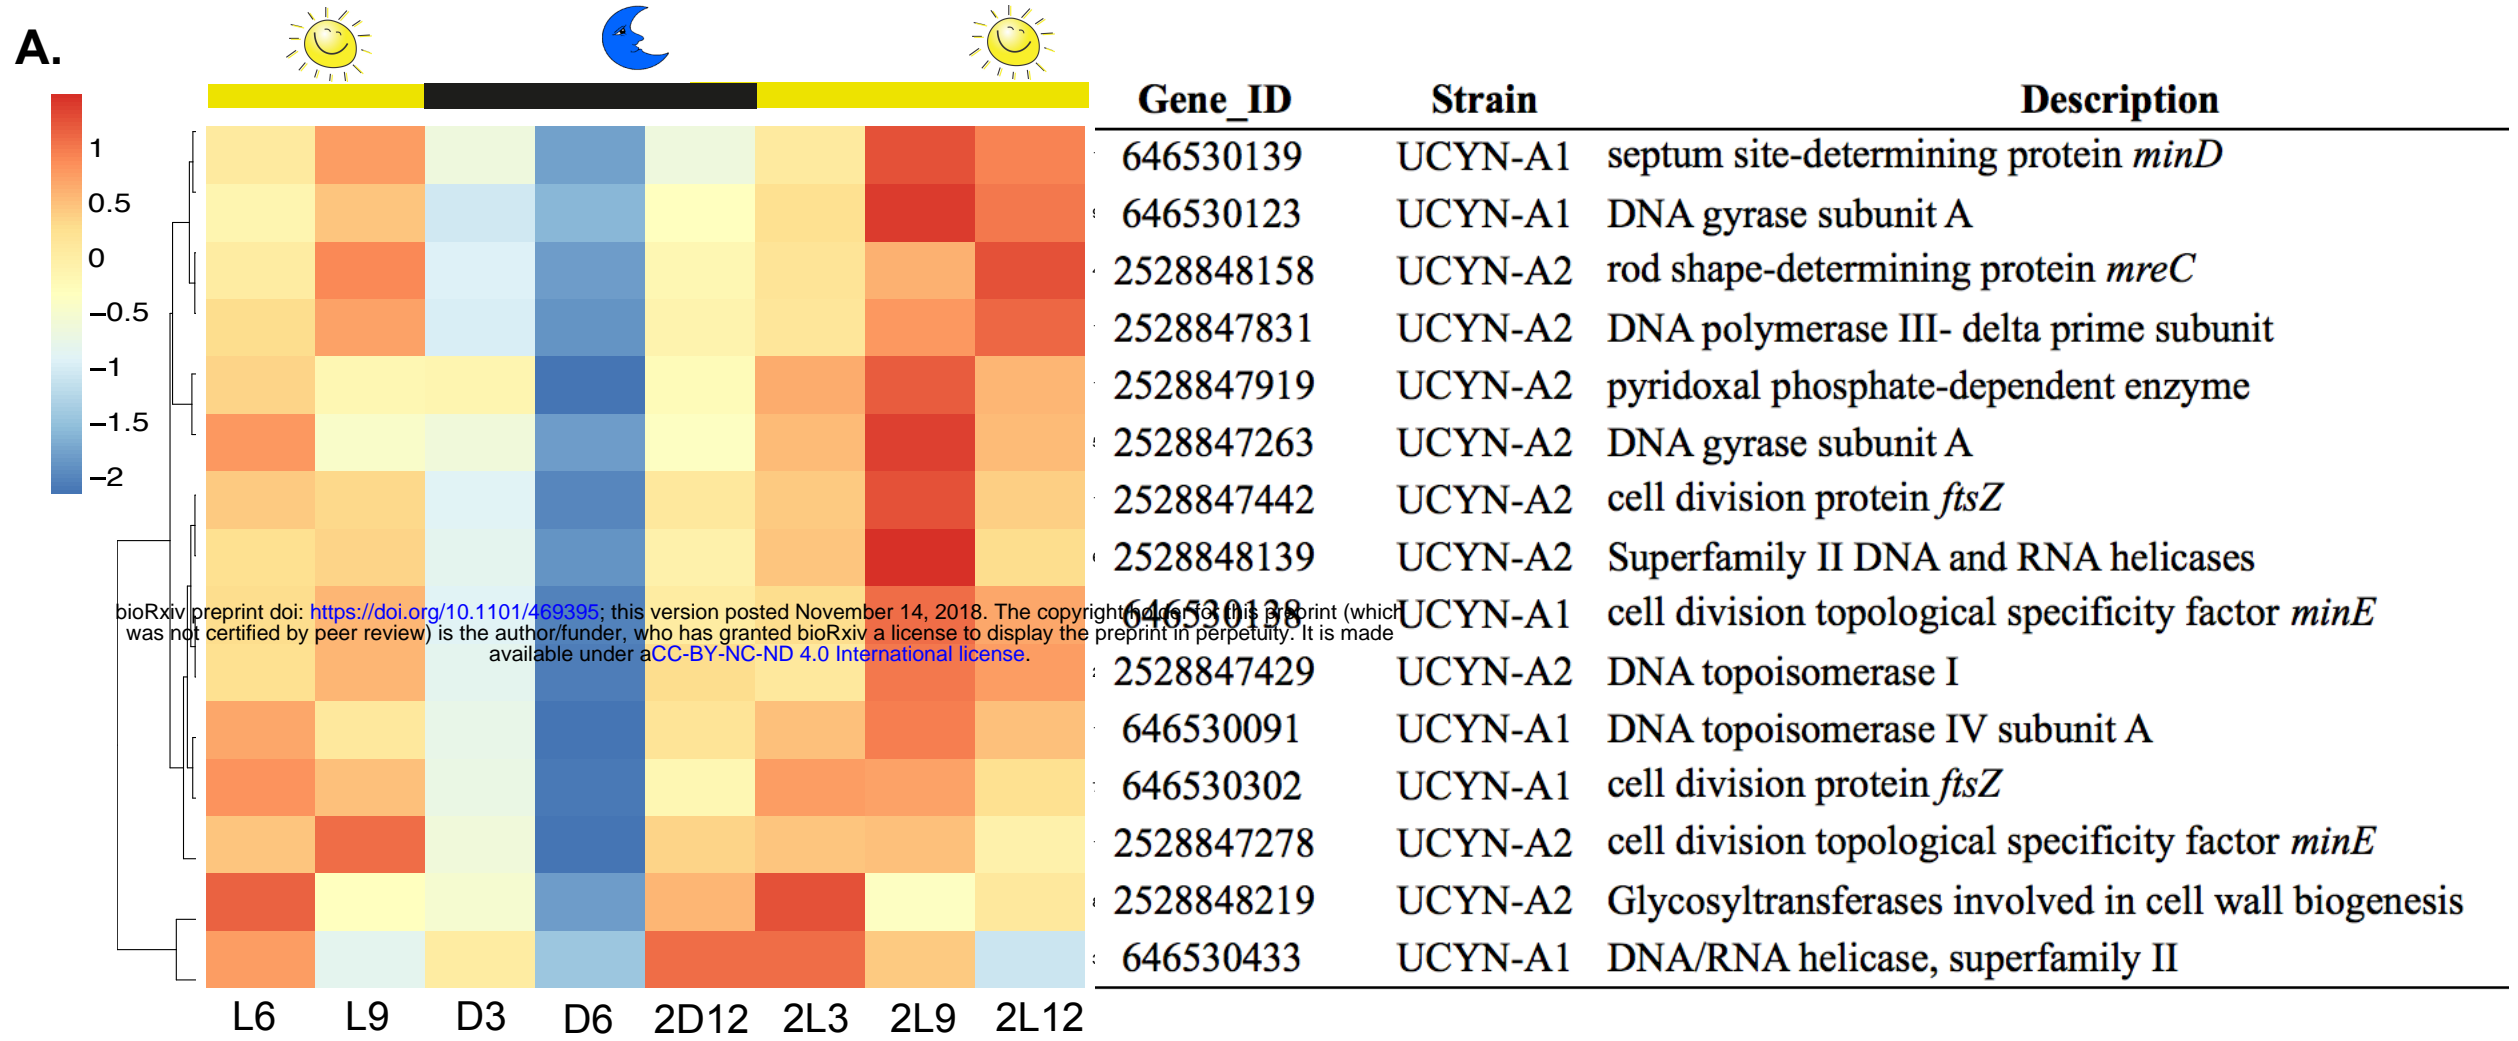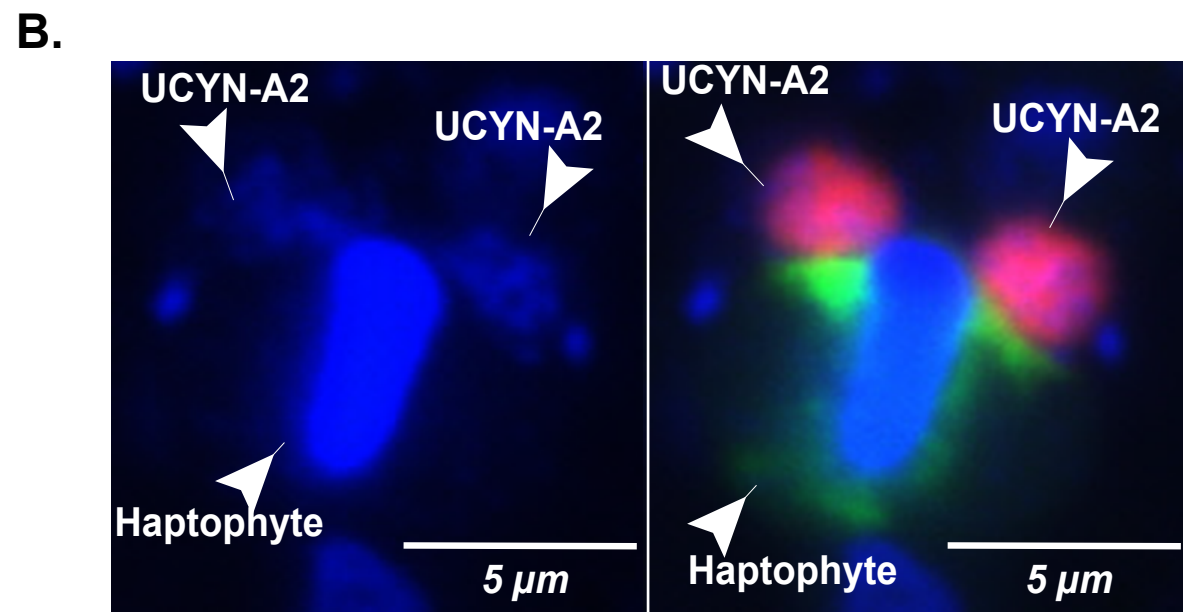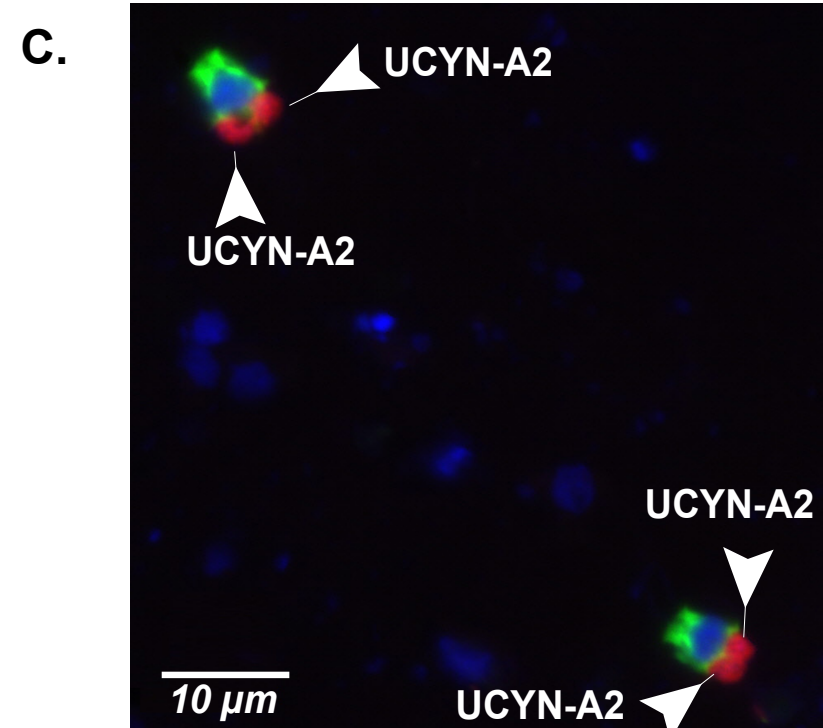

# Unicellular N<sub>2</sub>-fixing cyanobacteria

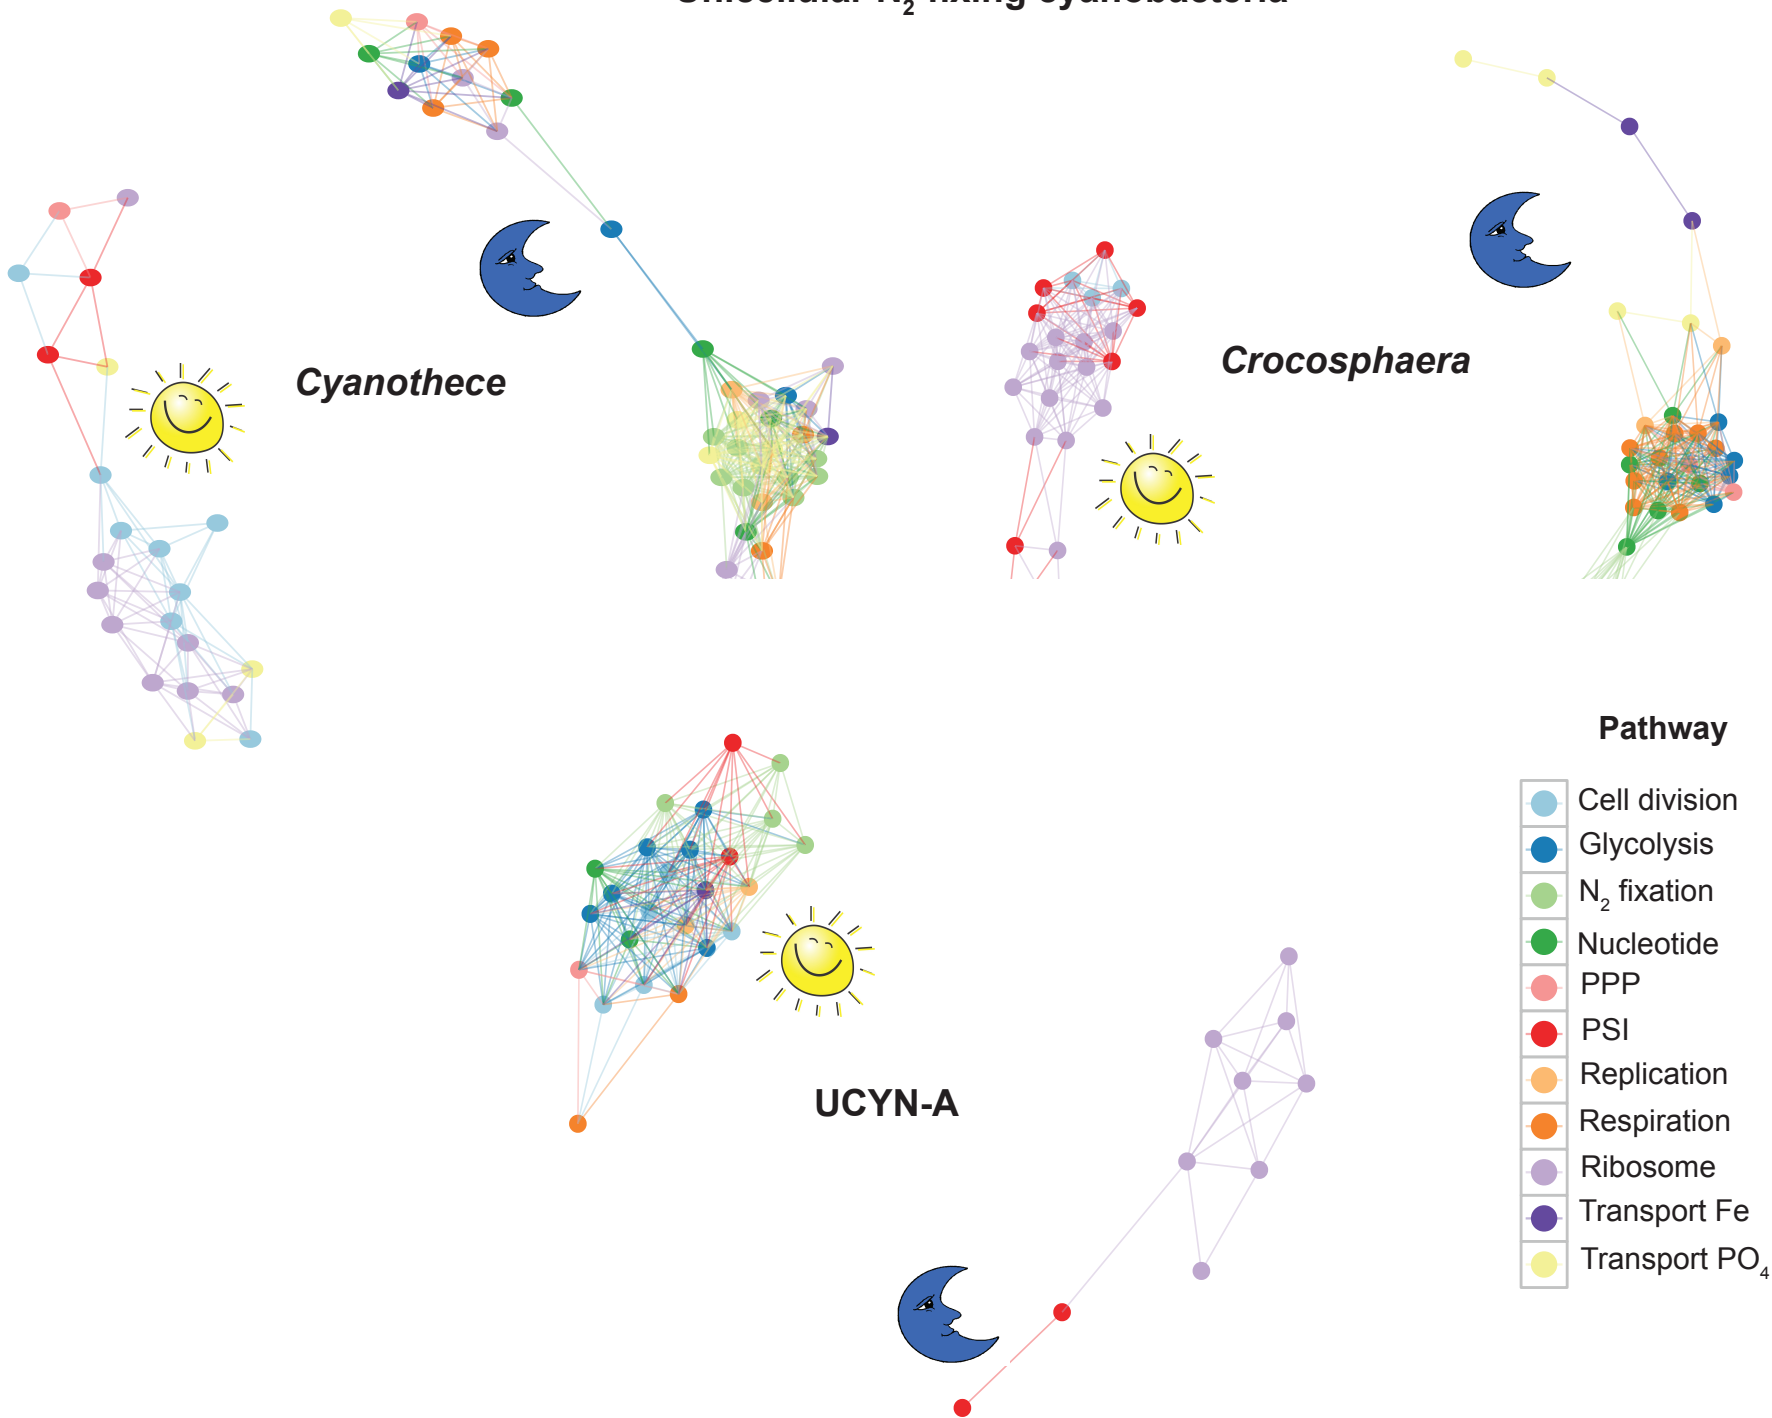

# Glycolysis

UCYN-A1

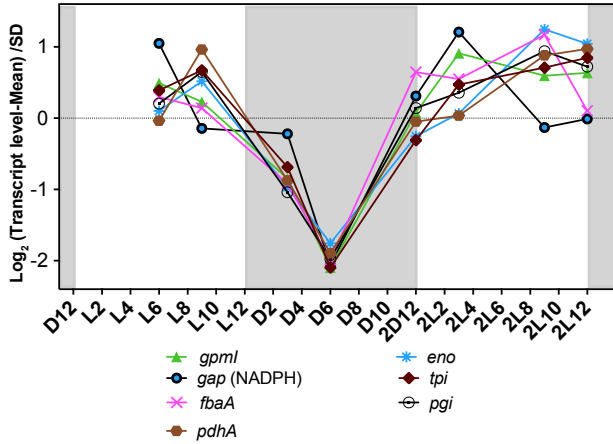

UCYN-A2

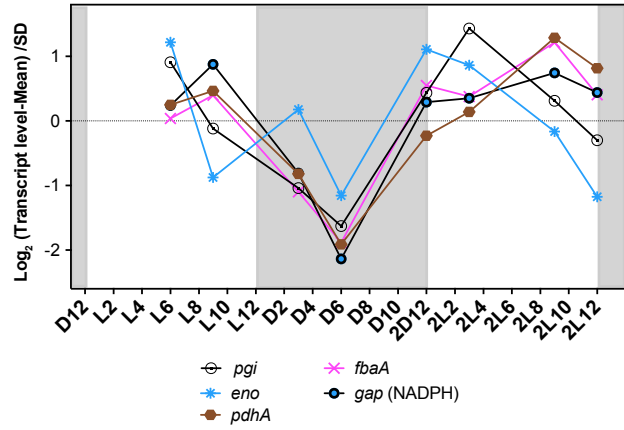

Cyanothecae ATCC 51142

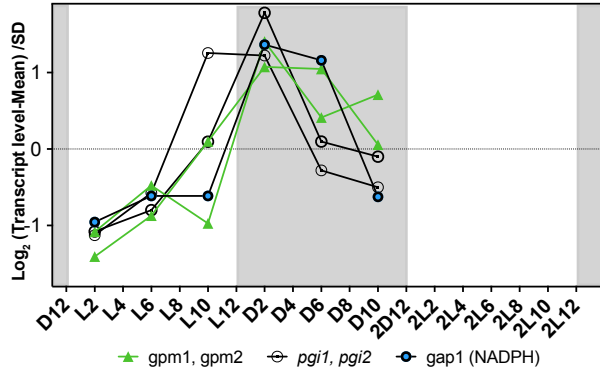

Trichodesmium erythraeum IMS101

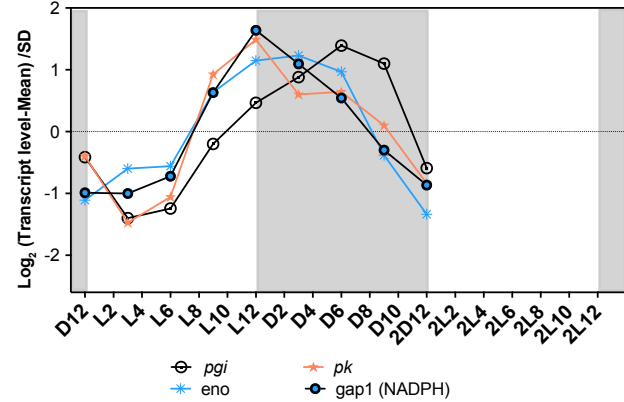

Crocospaera watsonii WH 8501

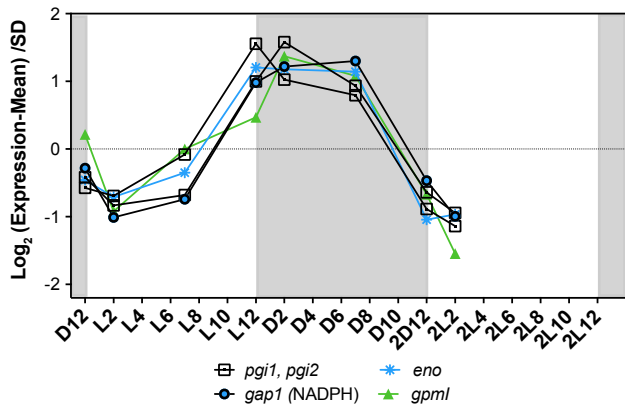

Prochlorococcus sp. MED4

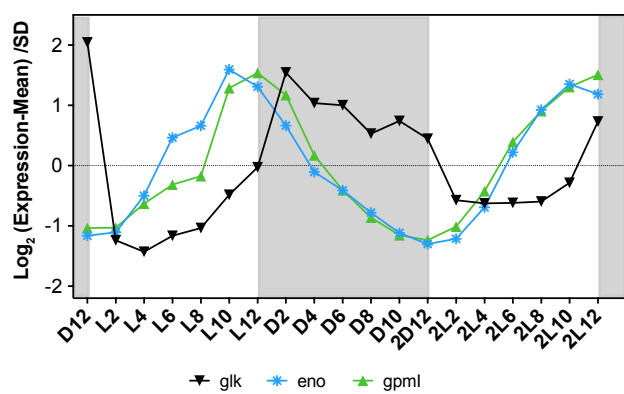



# Pentose phosphate

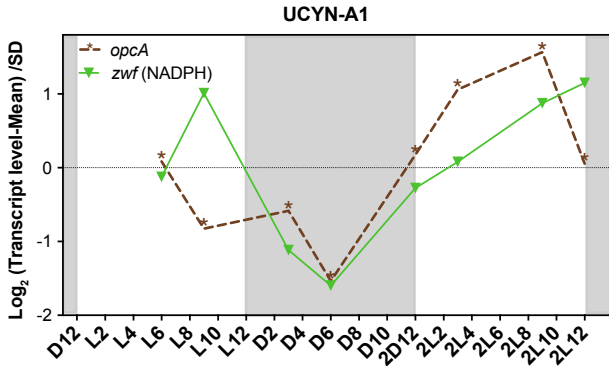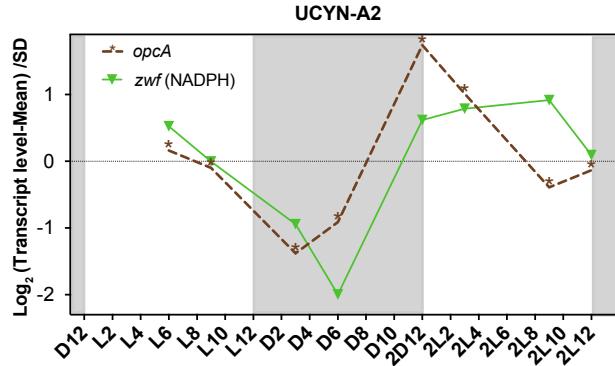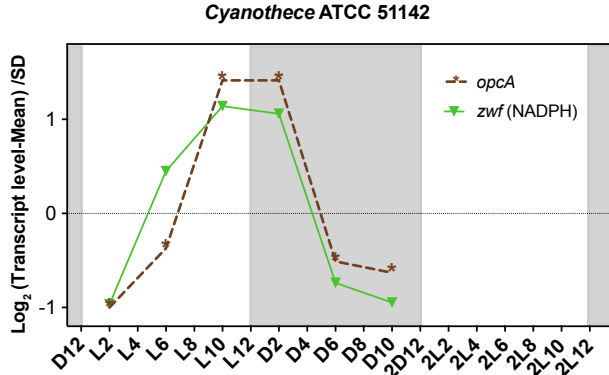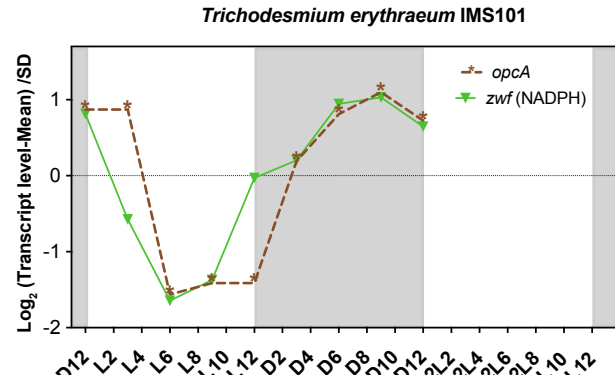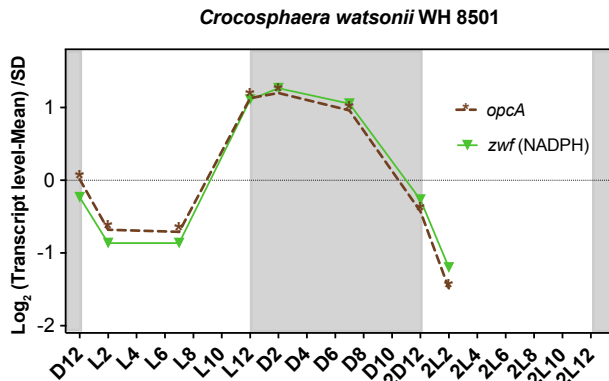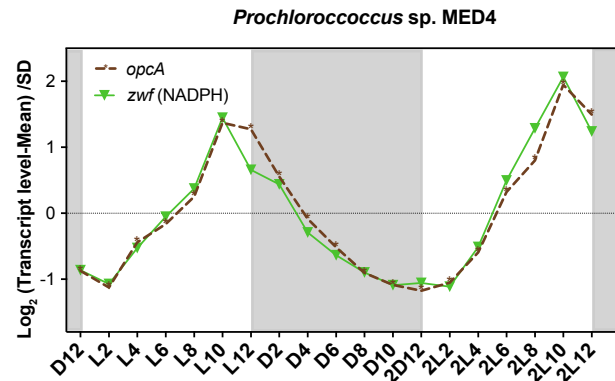

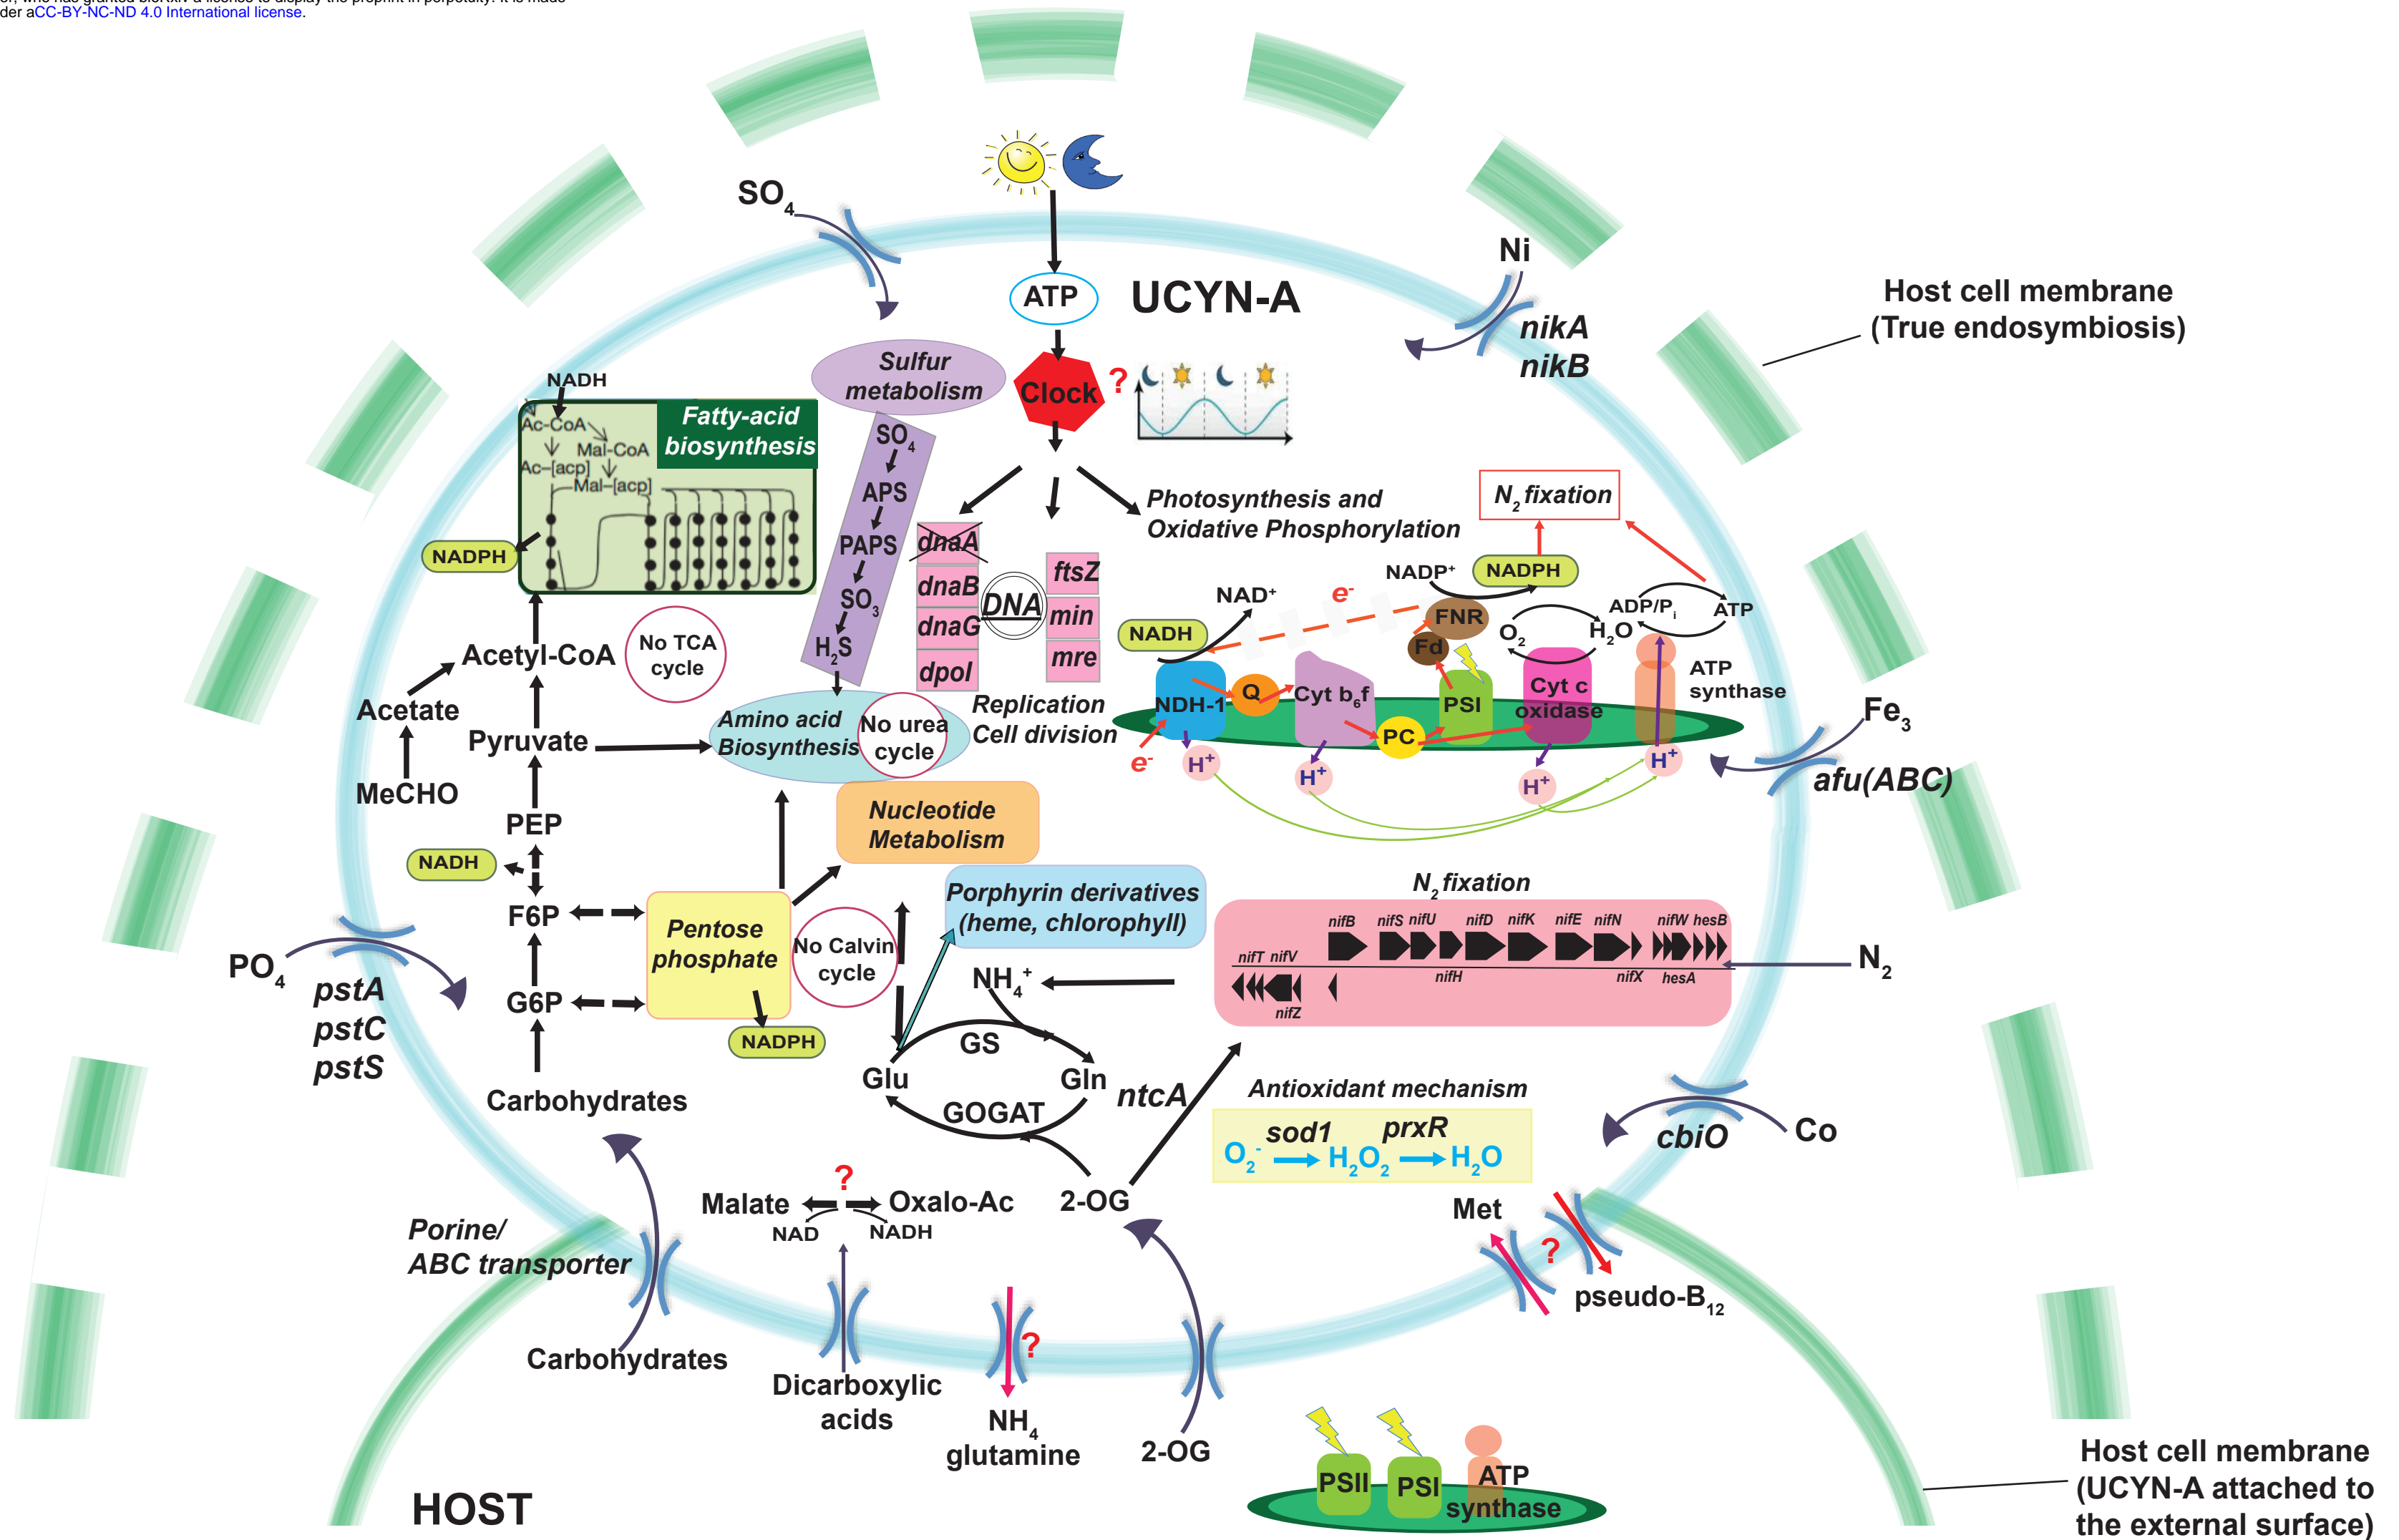

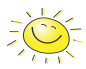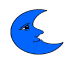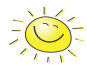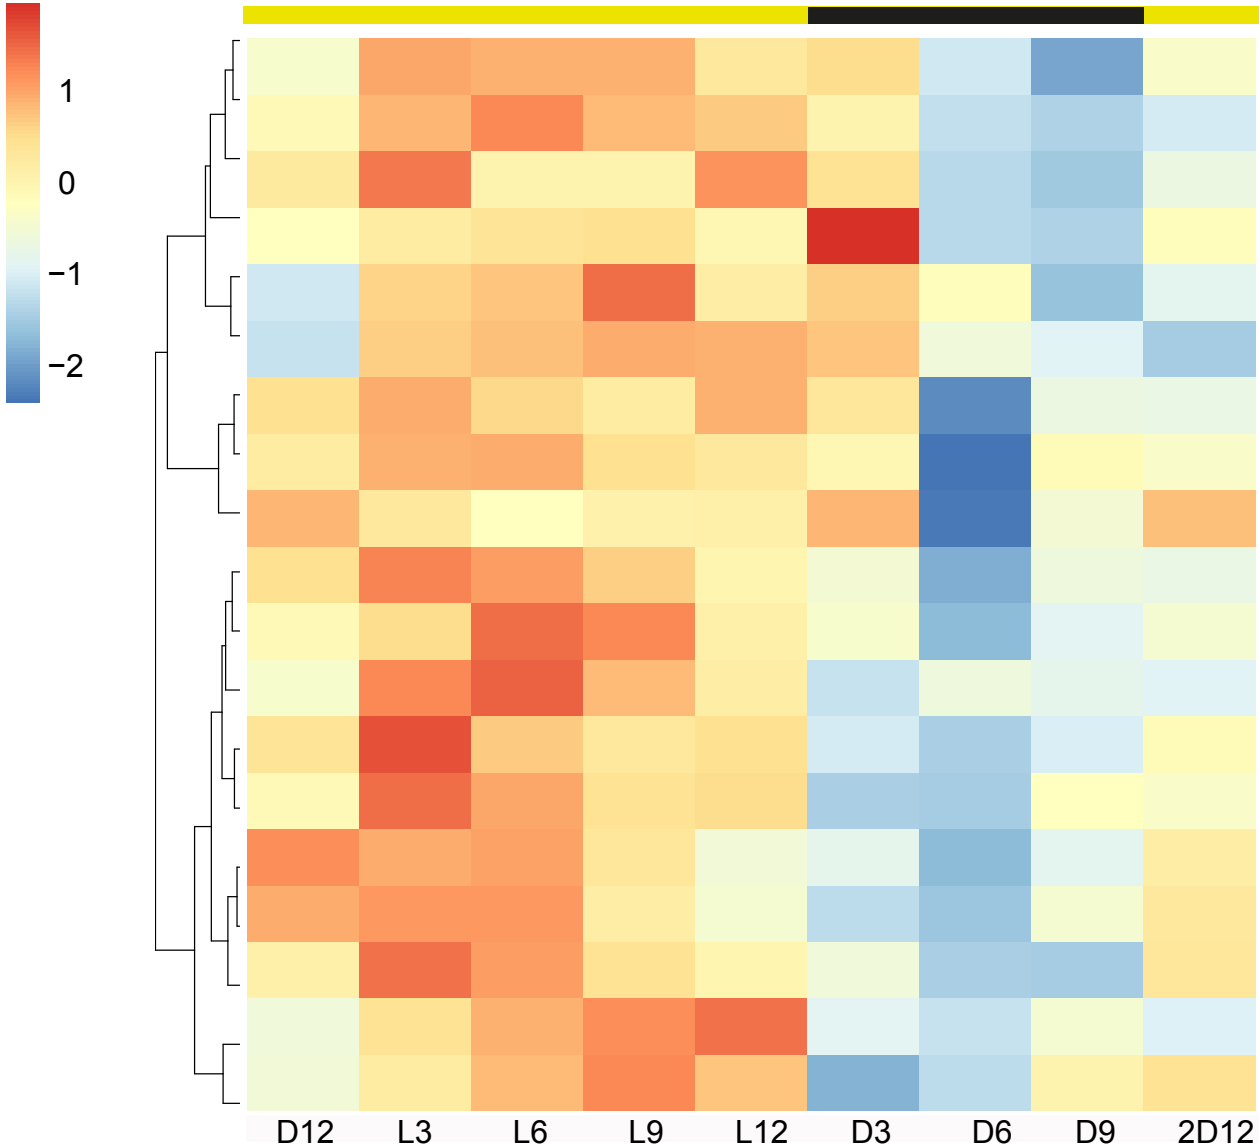

| Gene_ID   | Description                                              | Pathway                |
|-----------|----------------------------------------------------------|------------------------|
| Tery_3301 | MutS2 family protein                                     | Replication and Repair |
| Tery_2841 | glucose inhibited division protein A                     | Cell Growth and Death  |
| Tery_4190 | single-stranded-DNA-specific exonuclease <i>RecJ</i>     | Replication and Repair |
| Tery_0168 | Holliday junction DNA helicase <i>RuvA</i>               | Replication and Repair |
| Tery_3645 | DNA mismatch repair protein <i>MutS</i>                  | Replication and Repair |
| Tery_0165 | DNA recombination protein, <i>RuvA</i>                   | Replication and Repair |
| Tery_4942 | cell cycle protein                                       | Cell Growth and Death  |
| Tery_0212 | DNA polymerase III, delta subunit                        | Replication and Repair |
| Tery_2316 | DNA ligase, NAD-dependent                                | Replication and Repair |
| Tery_1165 | protein of unknown function DUF59                        | Cell Growth and Death  |
| Tery_0163 | maf protein                                              | Cell Growth and Death  |
| Tery_0413 | phage SPO1 DNA polymerase-related protein                | Replication and Repair |
| Tery_0001 | chromosomal replication initiator protein <i>DnaA</i>    | Replication and Repair |
| Tery_4604 | DNA repair protein <i>RecO</i>                           | Replication and Repair |
| Tery_4232 | ATP-dependent DNA helicase <i>PcrA</i>                   | Replication and Repair |
| Tery_0348 | transposase, IS605 <i>OrfB</i> family                    | Replication and Repair |
| Tery_3302 | cell cycle protein                                       | Cell Growth and Death  |
| Tery_3384 | cell division topological specificity factor <i>MinE</i> | Cell Growth and Death  |
| Tery_3269 | endonuclease III                                         | Replication and Repair |

**A.**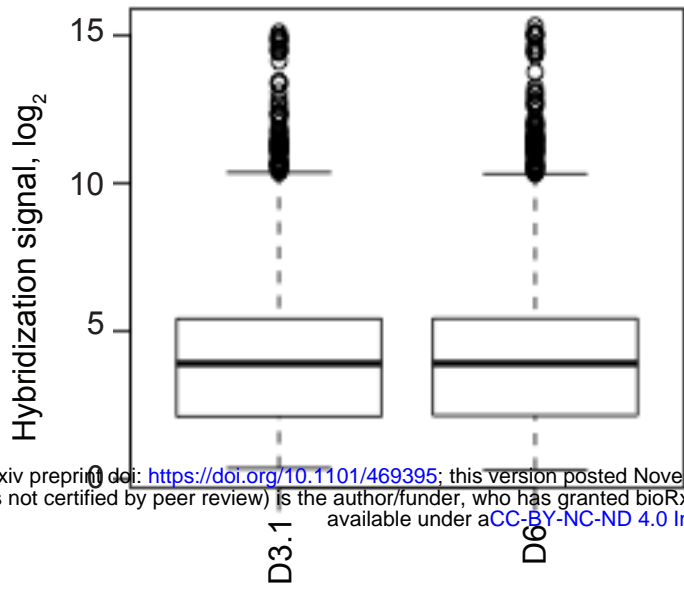**D.**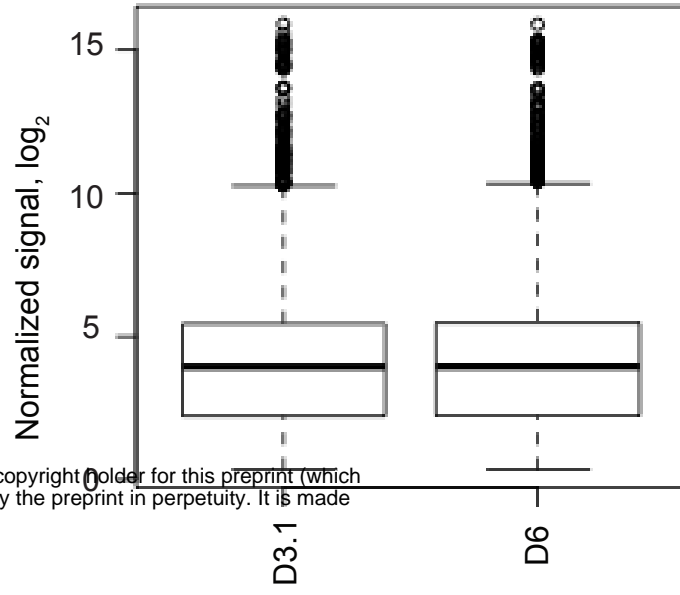

bioRxiv preprint doi: <https://doi.org/10.1101/469395>; this version posted November 14, 2018. The copyright holder for this preprint (which was not certified by peer review) is the author/funder, who has granted bioRxiv a license to display the preprint in perpetuity. It is made available under aCC-BY-NC-ND 4.0 International license.

**B.**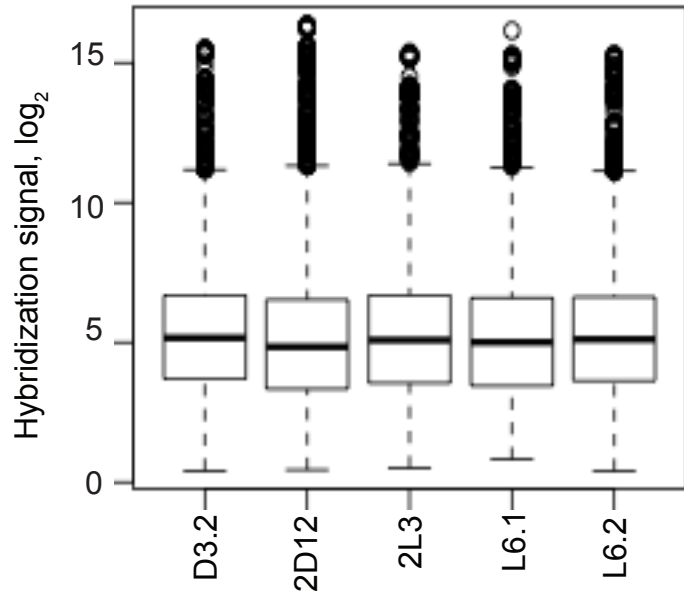**E.**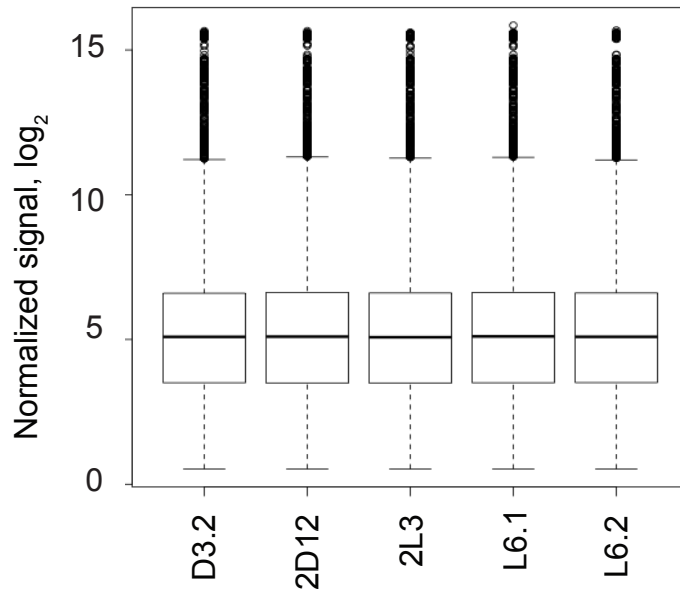**C.**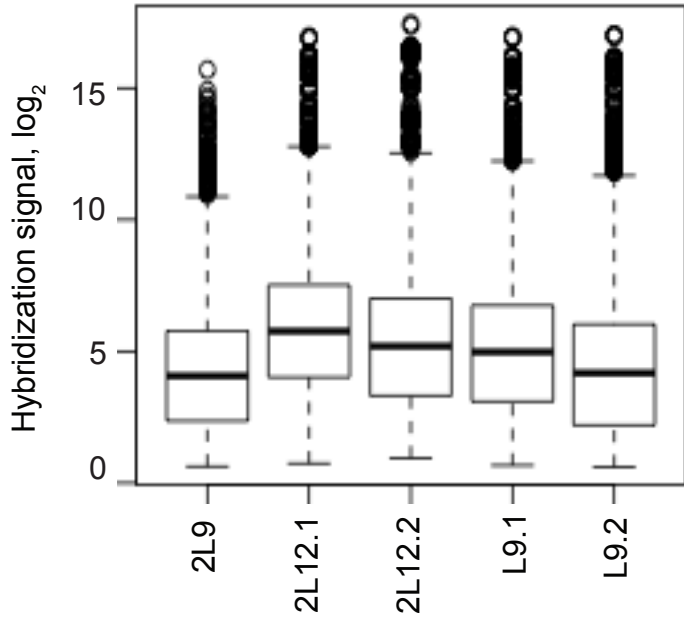**F.**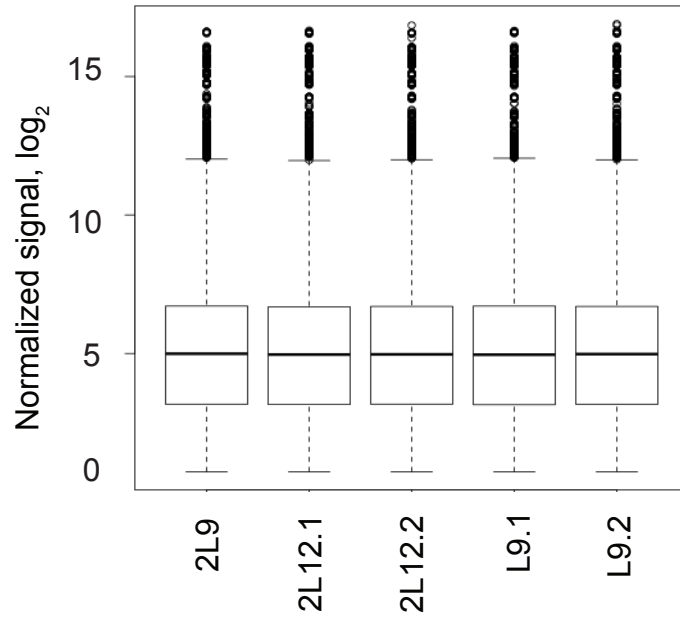

**A.**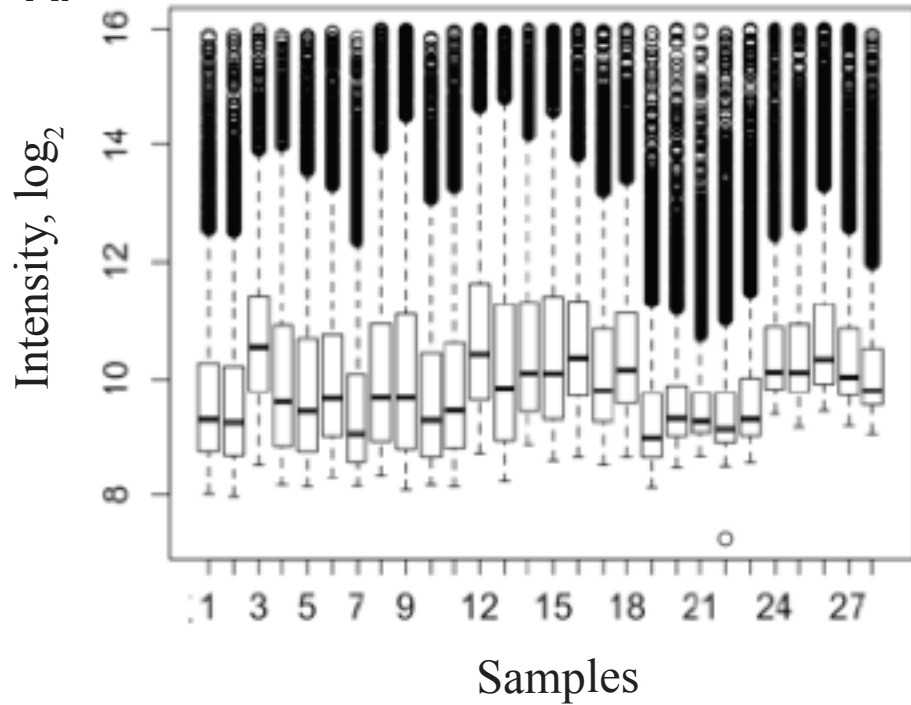**B.**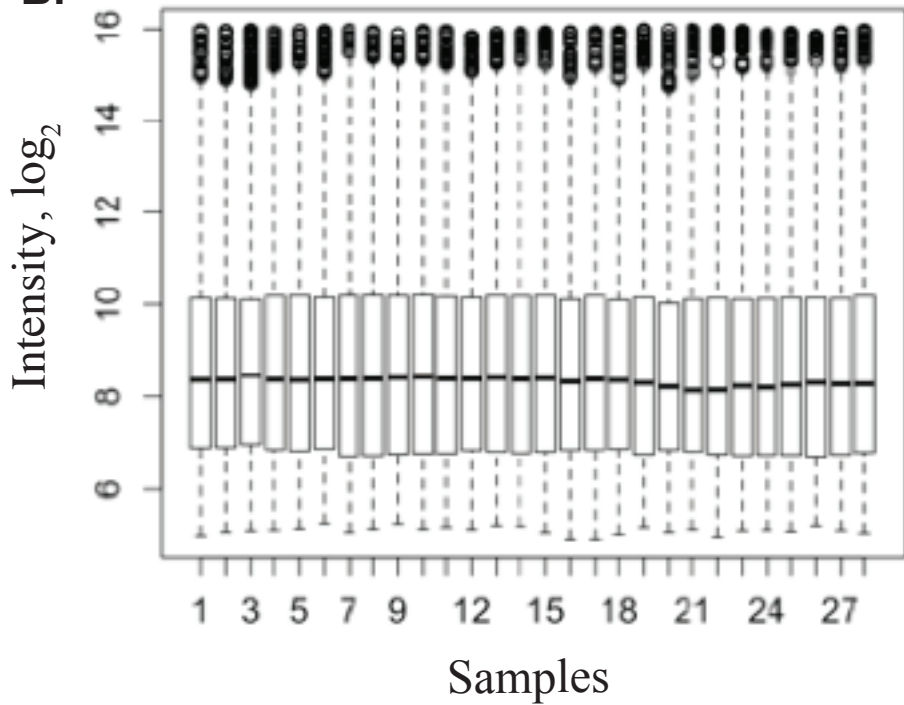

| <b>Number of genes</b>             | <b><i>T. erythraeum</i> IMS101</b> | <b><i>C. watsonii</i> WH8501</b> | <b><i>Cyanothece</i> ATCC 51142</b> | <b>UCYN-A</b> | <b><i>Prochlorococcus</i> MED4</b> |
|------------------------------------|------------------------------------|----------------------------------|-------------------------------------|---------------|------------------------------------|
| Targeted on the microarray         | 4,788                              | 4,407                            | 5,040                               | 1,194         | 1,698                              |
| With detected transcription        | 4,305                              | 4,140                            | 4,312                               | 365           | 1,511                              |
| Have diel pattern of transcription | 1,620                              | 1,708                            | 998                                 | 316           | 1,370                              |
| <b>Percent</b>                     |                                    |                                  |                                     |               |                                    |
| With detected transcription        | 89.9                               | 93.9                             | 85.6                                | 30.6          | 89.0                               |
| Have diel pattern of transcription | 33.8                               | 38.8                             | 19.8                                | 26.5          | 80.7                               |



|                            | <b>Sampling Time</b> | <b>Host associated with 1 UCYN-A2 cluster (cells ml<sup>-1</sup>)</b> | <b>Host associated with 2 UCYN-A2 clusters (cells ml<sup>-1</sup>)</b> | <b>Host associated with 2 UCYN-A2 clusters (%)</b> |
|----------------------------|----------------------|-----------------------------------------------------------------------|------------------------------------------------------------------------|----------------------------------------------------|
| <b><i>Diel cycle 1</i></b> | 12 pm                | 36.5                                                                  | 0.0                                                                    | 0.0                                                |
|                            | 3 pm                 | 38.0                                                                  | 0.0                                                                    | 0.0                                                |
|                            | 6 pm                 | 9.1                                                                   | 0.0                                                                    | 0.0                                                |
|                            | 9 pm                 | 12.2                                                                  | 15.2                                                                   | 55.6                                               |
|                            | 12 am                | 6.1                                                                   | 9.1                                                                    | 60.0                                               |
|                            | 3 am                 | 41.0                                                                  | 10.6                                                                   | 20.6                                               |
|                            | 6 am                 | 7.6                                                                   | 0.0                                                                    | 0.0                                                |
|                            | 9 am                 | 38.0                                                                  | 0.0                                                                    | 0.0                                                |
| <b><i>Diel cycle 2</i></b> | 12 pm                | 44.1                                                                  | 0.0                                                                    | 0.0                                                |
|                            | 3 pm                 | 53.2                                                                  | 0.0                                                                    | 0.0                                                |
|                            | 6 pm                 | 36.5                                                                  | 0.0                                                                    | 0.0                                                |
|                            | 9 pm                 | 16.7                                                                  | 28.9                                                                   | 63.3                                               |
|                            | 12 am                | 34.9                                                                  | 51.7                                                                   | 59.6                                               |
|                            | 3 am                 | 51.7                                                                  | 4.6                                                                    | 8.1                                                |
|                            | 6 am                 | 66.8                                                                  | 0.0                                                                    | 0.0                                                |
|                            | 9 am                 | 27.3                                                                  | 0.0                                                                    | 0.0                                                |

□



| Probe Name                 | Target                                | Sequence (5' to 3')   | Reference                  |
|----------------------------|---------------------------------------|-----------------------|----------------------------|
| <b>UPRYM69</b>             | Host-A1                               | CACATAGGAACATCCTCC    | Cornejo-Castillo et al.(6) |
| <b>UPRYM69 competitor</b>  | Host-A2 used as<br>Host-A1 competitor | CACATTGGAACATCCTCC    | Cornejo-Castillo et al.(6) |
| <b>UBRADO69</b>            | Host-A2                               | CACATTGGAACATCCTCC    | Cornejo-Castillo et al.(6) |
| <b>UBRADO69 competitor</b> | Host-A1 used as<br>Host-A2 competitor | CACATAGGAACATCCTCC    | Cornejo-Castillo et al.(6) |
| <b>Helper A-PRYM</b>       | <i>Haptophyta</i>                     | GAAAGGTGCTGAAGGAGT    | Cornejo-Castillo et al.(6) |
| <b>Helper B-PRYM</b>       | <i>Haptophyta</i>                     | AATCCCTAGTCGGCATGG    | Cornejo-Castillo et al.(6) |
| <b>UCYN-A1 732</b>         | UCYN-A1                               | GTTACGGTCCAGTAGCAC    | Krupke et al.(5)           |
| <b>UCYN-A1 competitor</b>  | UCYN-A2 used<br>as UCYN-A1 competitor | GTTGCGGTCCAGTAGCAC    | Cornejo-Castillo et al.(6) |
| <b>UCYN-A2 732</b>         | UCYN-A2                               | GTTGCGGTCCAGTAGCAC    | Cornejo-Castillo et al.(6) |
| <b>UCYN-A2 competitor</b>  | UCYN-A1 used<br>as UCYN-A2 competitor | GTTACGGTCCAGTAGCAC    | Krupke et al.(5)           |
| <b>Helper A-732</b>        | UCYN-A                                | GCCTTCGCCACCGATGTTCTT | Krupke et al.(5)           |
| <b>Helper B-732</b>        | UCYN-A                                | AGCTTTCGTCCTGAGTGTC   | Krupke et al.(5)           |
